# Supplementary material for: Genomic Analysis of Mouse Retinal Development
Source: PLoS Biol. 2004 Jun 29;2(9):e247. doi: 10.1371/journal.pbio.0020247 (PMC439783; doi:10.1371/journal.pbio.0020247)
Supplement: Table S1 — The total cumulative number of tags found at each abundance level in all 12 retinal libraries (i.e., the ten libraries from total retinal of wild-type animals, the library from P10.5 crx−/− animals, and the library from microdissected ONL of adult animals) is shown. The number of tags, and the fraction of total tags, that do not show any reliable match for any gene (data from NCBI) are also shown. (14 KB XLS). [file pbio.0020247.st001.xls]

## Sheet: Sheet1
Table ST1
Cumulative SAGE tag total in all 12 retinal libraries	Total tags	Total unknown tags	Fraction unknown
1 or greater	119781	42549	0.355223
2 or greater	43839	4367	0.0996145
3 or greater	26633	1549	0.0581609
4 or greater	19864	828	0.0416834
5 or greater	16216	551	0.0339788
6 or greater	13837	404	0.0291971
7 or greater	12124	320	0.0263939
8 or greater	10796	265	0.0245461
9 or greater	9779	221	0.0225994
10 or greater	8945	185	0.0206819
Total tags	651759
