# Supplementary material for: Genomic Analysis of Mouse Retinal Development
Source: PLoS Biol. 2004 Jun 29;2(9):e247. doi: 10.1371/journal.pbio.0020247 (PMC439783; doi:10.1371/journal.pbio.0020247)
Supplement: Table S8 — The fraction listed notes the fraction of genes in the machine-generated cluster that were found in a given user-curated cellular expression cluster. The presumptive cellular expression pattern of each user-curated cellular expression cluster is also listed (following Table S6). (86 KB XLS). [file pbio.0020247.st008.xls]

## Sheet: Sheet1
Table ST8
	Machine-generated cluster
	1	2	3	4	5	6	7	8	9	10	11	12	13	14	15	16	17	18	19	20	21	22	23	24	25	26	27	28	29	30	31	32	33	34	35	36	37	38	39	40	41	42	43	44	45	Cellular expression pattern
User-generated cluster
1	0	0	0	0	0	0	0	0	0	0	0	0	0	0	0	0	0	0	0	0	0	0	0	0	0	0	0	0	0.3	0	0	0	0	0	0	0	0	0	0	0	0	0	0	0	0	BC
2	0	0	0.027027	0	0	0	0	0	0	0	0.0666667	0	0	0	0	0	0.0263158	0	0	0	0	0	0	0	0	0	0.333333	0	0	0	0	0	0	0	0	0	0	0	0	0	0	0	0	0	0	BC
3	0	0	0	0	0	0	0	0.0625	0	0	0	0	0	0	0	0	0	0	0	0	0	0	0	0	0	0	0	0	0.3	0	0	0	0	0	0.0204082	0	0	0	0.0666667	0	0.0277778	0.047619	0	0	0	BC-prog
4	0	0.318182	0.0810811	0.142857	0.0555556	0.0526316	0.0869565	0.0625	0.473684	0	0	0	0.142857	0	0	0	0.342105	0	0	0	0	0	0.3	0.0588235	0.0666667	0	0	0.05	0.2	0	0.388889	0	0.125	0	0.387755	0.0555556	0.05	0.1	0	0	0.0555556	0.285714	0.125	0	0	MG-prog
5	0	0.181818	0	0	0	0	0	0	0	0	0	0	0	0	0	0	0	0	0	0	0	0	0	0	0	0	0	0	0	0	0	0	0	0	0	0	0	0	0	0	0	0	0	0	0	MG-mid
6	0	0	0	0	0	0	0	0	0	0	0	0	0	0	0	0	0.0263158	0	0	0	0	0	0	0	0	0	0	0	0	0	0	0	0	0	0.0408163	0	0	0	0	0	0	0	0	0	0	MG-late
7	0	0	0.0810811	0	0	0	0	0.0625	0.0526316	0	0	0	0	0	0.222222	0	0	0.5	0	0	0	0.186047	0	0	0.0666667	0	0	0.175	0	0	0	0.0666667	0	0	0	0	0	0	0.333333	0	0	0.285714	0	0	0	Pr-prog+prec
8	0	0.0454545	0	0	0	0	0.0434783	0	0	0	0	0	0	0	0	0	0.0263158	0	0	0	0	0.0232558	0	0	0	0	0	0.05	0	0	0.0555556	0	0	0	0.0612245	0	0	0	0	0	0	0.047619	0	0	0	Pr-prog
9	0	0	0.027027	0	0	0	0	0	0	0	0	0	0	0	0	0	0	0	0	0	0	0.0232558	0	0	0	0	0	0	0	0	0	0	0	0	0	0	0	0	0	0	0	0	0	0	0	Prs-prog+prec
10	0.545455	0	0.27027	0	0.611111	0.473684	0.0434783	0.25	0	0	0	1	0	0	0	0	0.0263158	0.5	0	0	0	0	0	0	0.0666667	0	0	0.35	0	0	0	0.133333	0	0.708333	0.0204082	0.444444	0	0.35	0.266667	0	0.25	0.190476	0.25	0	0.428571	PrIn-prog+prec
11	0.0909091	0	0.0810811	0	0.0555556	0	0	0	0	0	0	0	0	0	0	0	0	0	0	0	0	0.0232558	0	0	0	0	0	0.05	0	0	0	0	0	0	0	0	0	0	0.133333	0	0.111111	0	0	0	0	PrB-prog+prec
12	0	0	0.0810811	0	0	0	0	0	0	0	0	0	0	0	0	0	0.0789474	0	0	0	0	0.0465116	0	0	0	0	0	0	0	0	0.0555556	0	0	0	0	0	0	0.05	0	0	0.0555556	0	0	0	0	PrIn-prog
13	0	0	0.0810811	0	0	0	0	0	0	0	0	0	0	0	0	0	0	0	0	0	0	0.255814	0	0.294118	0	0	0	0	0	0	0	0	0	0	0	0	0	0	0	0	0	0	0.0625	0	0	Pr
14	0	0	0.027027	0	0	0	0	0	0	0	0	0	0	0	0	0	0	0	0	0	0	0	0	0.0588235	0	0	0	0	0	0	0	0	0	0	0	0	0	0	0	0	0	0	0	0	0	PrB
15	0	0	0.027027	0	0	0	0	0	0	0	0	0	0	0	0	0	0	0	0	0	0	0	0	0.0588235	0	0	0	0	0	0	0	0	0	0	0	0	0	0.2	0	0	0	0	0	0	0	PrIn
16	0	0	0	0	0	0	0	0	0	0	0	0	0	0	0	0	0	0	0	0	0	0.232558	0	0.0588235	0	0	0	0	0	0	0	0	0	0	0	0	0	0	0	0.0909091	0	0	0	0	0	Pr
17	0	0	0	0	0	0	0	0	0	0	0	0	0	0	0	0	0	0	0	0	0	0.0465116	0	0	0	0	0	0.05	0	0	0	0	0	0.0416667	0	0	0	0	0	0	0	0	0	0	0	Pr-sprog
18	0	0	0	0	0	0	0	0	0	0	0	0	0	0	0	0	0	0	0	0	0	0.0232558	0	0	0	0	0	0.05	0	0	0	0	0	0	0	0	0	0	0	0	0	0	0	0	0	Pr-prec
19	0	0	0	0.285714	0.0555556	0	0	0.125	0	0	0	0	0	0.214286	0.111111	0	0	0	0	0.2	0	0	0	0	0	0	0	0.025	0	0	0	0.4	0	0	0	0	0	0	0	0	0	0	0	0	0	Prec
20	0.272727	0	0.108108	0.285714	0.111111	0.157895	0.173913	0	0.0526316	0	0	0	0	0	0	0	0	0	0	0	0	0	0	0	0	0	0	0	0	0	0.111111	0.0666667	0	0.0416667	0.0204082	0	0	0.15	0	0	0.166667	0.047619	0	0	0	Prec
21	0	0	0	0	0	0	0.217391	0.0625	0	0	0	0	0	0.142857	0	0	0	0	0	0	0	0	0	0	0	0	0	0	0	0	0	0	0.25	0	0	0.0555556	0.3	0	0	0	0	0	0.0625	0	0.142857	AC-M-phase prog
22	0	0	0	0	0	0	0	0	0	0	0	0	0	0.142857	0.555556	0	0	0	0	0	0	0.0232558	0	0	0	0	0	0.025	0	0	0	0.0666667	0	0	0	0	0.05	0	0	0	0	0	0	0	0	Pr-AC+GC
23	0	0	0	0	0	0	0.0434783	0	0	0	0.0666667	0	0	0	0	0	0	0	0.0625	0	0	0	0	0	0.0666667	0	0	0	0	0	0	0	0	0	0	0	0	0	0	0	0	0	0.0625	0	0	Panneuronal
24	0.0909091	0	0.0540541	0	0.111111	0.105263	0	0.0625	0	0	0.0666667	0	0	0	0	0	0	0	0	0	0	0.0465116	0.4	0	0.133333	0	0	0.025	0.2	0	0	0	0.125	0.208333	0.0204082	0.166667	0	0.05	0	0	0.194444	0	0	0	0	BC+MG-prog+prec
25	0	0	0	0	0	0	0	0	0	0	0.133333	0	0.142857	0	0	0	0	0	0	0	0	0	0	0	0.0666667	0	0	0	0	0	0	0	0	0	0	0.166667	0	0	0	0	0.0277778	0	0.125	0.1	0.142857	AC-prog
26	0	0	0	0	0	0	0.0434783	0.0625	0.0526316	0	0	0	0	0	0	0	0	0	0	0	0	0	0	0	0	0	0	0.075	0	0	0	0	0	0	0.102041	0	0	0	0.0666667	0	0.0277778	0.0952381	0	0	0	prog+prec
27	0	0.0454545	0	0	0	0	0	0.0625	0	0	0	0	0	0	0	0	0	0	0	0	0	0	0	0	0	0	0	0	0	0	0	0	0.125	0	0	0	0	0	0	0	0	0	0	0	0	AC+GC-M-phase prog
28	0	0.0454545	0.027027	0	0	0	0	0.0625	0.210526	0	0	0	0	0	0	0	0.105263	0	0	0	0	0	0.1	0	0.0666667	0	0	0	0	0	0.222222	0	0.25	0	0.183673	0	0	0.05	0	0	0	0	0	0	0	Prog
29	0	0	0	0	0	0.0526316	0	0	0	0	0.133333	0	0	0	0	0	0	0	0	0	0	0	0	0	0	0	0	0	0	0	0	0	0	0	0	0	0	0	0	0	0.0277778	0	0	0	0	Panneuronal+prog
30	0	0	0	0	0	0	0	0	0.105263	0	0	0	0	0	0	0	0	0	0	0	0	0	0	0	0	0	0	0	0	0	0	0	0	0	0	0	0	0	0	0	0	0	0	0	0	Prog
31	0	0.0909091	0	0	0	0	0	0	0	0	0	0	0	0	0	0	0	0	0	0	0	0	0	0	0	0	0.166667	0	0	0	0	0	0	0	0	0	0	0	0	0	0	0	0	0	0	Prec
32	0	0	0	0	0	0	0	0	0	0	0	0	0	0	0	0	0	0	0	0	0	0	0	0	0	0	0	0	0	0	0.0555556	0	0	0	0	0	0	0	0	0	0	0	0	0	0	Prog+sGC
33	0	0.0454545	0	0	0	0.0526316	0.0434783	0	0	0	0	0	0.0714286	0	0	0	0.0263158	0	0	0	0	0.0232558	0	0	0	0	0	0	0	0	0	0	0	0	0	0	0	0	0.0666667	0	0	0	0	0.2	0.142857	Prog
34	0	0	0	0	0	0	0	0	0	0	0	0	0	0	0	0	0.0526316	0	0	0	0	0	0	0	0	0	0	0	0	0	0	0	0	0	0.0612245	0	0	0	0	0	0	0	0	0	0	Prog(early subset)
35	0	0.0454545	0	0	0	0	0	0	0	0	0	0	0	0	0	0	0.0263158	0	0	0	0	0	0	0	0	0	0	0	0	0	0	0	0	0	0.0204082	0	0	0	0	0	0	0	0	0	0	Prog(complex subset)
36	0	0	0	0	0	0	0	0	0	0	0	0	0	0	0	0	0.0789474	0	0	0	0	0	0	0	0	0	0	0	0	0	0.0555556	0	0	0	0	0	0	0	0	0	0	0	0	0	0	Prog(complex subset)
37	0	0	0.027027	0	0	0	0	0	0	0	0	0	0.428571	0	0	0	0	0	0	0	0	0	0	0	0.2	0	0	0.025	0	0	0	0	0	0	0	0.0555556	0	0	0	0.181818	0.0277778	0	0	0	0.142857	AC-prog
38	0	0.136364	0	0	0	0	0	0.0625	0.0526316	0	0	0	0.0714286	0	0	0	0.0526316	0	0	0	0	0	0	0	0	0	0	0	0	0	0	0	0	0	0.0204082	0	0	0	0	0.0909091	0	0	0.0625	0	0	AC-prog
39	0	0	0	0	0	0	0	0	0	0	0	0	0	0	0	0.166667	0	0	0	0	0	0	0	0	0	0	0	0	0	0	0	0	0	0	0	0	0	0	0	0	0	0	0	0	0	AC
40	0	0	0	0	0	0	0	0	0	0	0	0	0	0	0	0.166667	0	0	0	0	0.285714	0	0	0	0	0	0	0	0	0	0	0	0	0	0	0	0	0	0	0.272727	0	0	0	0	0	AC+GC
41	0	0	0	0	0	0	0.26087	0	0	0.6	0	0	0.0714286	0.357143	0	0.166667	0	0	0.0625	0.6	0.571429	0	0	0	0.2	0.25	0	0.025	0	0	0	0.133333	0	0	0	0.0555556	0.4	0	0	0.272727	0	0	0.0625	0.5	0	AC+GC-prog
42	0	0	0	0	0	0	0	0	0	0	0	0	0	0	0	0.333333	0	0	0	0	0	0	0	0	0	0	0	0	0	0	0	0	0	0	0	0	0	0	0	0	0	0	0	0	0	AC-prog
43	0	0	0	0	0	0	0.0434783	0	0	0.2	0	0	0	0	0	0	0	0	0	0.2	0	0	0	0	0	0.5	0	0	0	0	0	0	0	0	0	0	0.15	0	0	0	0	0	0	0	0	GCs
44	0	0	0	0	0	0	0	0	0	0	0	0	0	0	0	0	0.0526316	0	0.0625	0	0	0	0	0	0	0	0.166667	0	0	0	0	0	0.125	0	0	0	0	0	0	0	0	0	0	0	0	HC-prog
45	0	0	0	0	0	0	0	0	0	0	0	0	0	0	0	0	0	0	0	0	0.142857	0	0	0	0	0	0	0	0	0	0	0	0	0	0	0	0.05	0	0	0	0	0	0	0	0	AC+H
46	0	0	0	0	0	0	0	0	0	0	0	0	0	0	0	0	0	0	0	0	0	0	0	0.0588235	0	0	0	0	0	0.5	0	0	0	0	0	0	0	0	0	0	0	0	0	0	0	RPE
47	0	0	0	0	0	0	0	0	0	0	0	0	0	0	0	0	0	0	0	0	0	0	0	0.176471	0	0	0	0	0	0	0	0	0	0	0	0	0	0	0	0	0	0	0	0	0	CM-early
48	0	0	0	0	0	0	0	0	0	0	0	0	0	0	0	0	0	0	0	0	0	0.0232558	0	0.0588235	0	0	0	0	0	0	0	0	0	0	0	0	0	0	0	0	0	0	0	0	0	Pr-CM
49	0	0	0	0	0	0	0	0	0	0	0	0	0	0	0	0	0	0	0	0	0	0	0	0.0588235	0	0	0	0	0	0	0	0.0666667	0	0	0	0	0	0	0	0	0	0	0	0	0	astrocytes
50	0	0	0	0	0	0	0	0	0	0	0	0	0	0	0	0	0	0	0	0	0	0	0	0	0	0	0	0	0	0	0	0	0	0	0.0204082	0	0	0.05	0	0	0	0	0	0	0	Bv
51	0	0	0	0.285714	0	0.105263	0	0.0625	0	0	0.4	0	0	0.142857	0.111111	0	0	0	0.8125	0	0	0	0	0	0.0666667	0	0	0.025	0	0	0	0	0	0	0	0	0	0	0	0	0.0277778	0	0.1875	0.1	0	Ubiquitous
52	0	0	0	0	0	0	0	0	0	0	0	0	0	0	0	0.166667	0	0	0	0	0	0	0	0	0	0	0	0	0	0	0	0	0	0	0	0	0	0	0	0	0	0	0	0	0	AC
53	0	0	0	0	0	0	0	0	0	0	0	0	0	0	0	0	0	0	0	0	0	0	0	0	0	0	0.166667	0	0	0	0	0	0	0	0	0	0	0	0	0	0	0	0	0	0	BC-AC
54	0	0	0	0	0	0	0	0	0	0	0	0	0	0	0	0	0	0	0	0	0	0	0	0	0	0	0	0	0	0	0	0	0	0	0.0204082	0	0	0	0	0	0	0	0	0	0	prog
55	0	0	0	0	0	0	0	0	0	0	0	0	0	0	0	0	0	0	0	0	0	0	0	0	0	0.25	0	0	0	0	0	0	0	0	0	0	0	0	0	0	0	0	0	0	0	GC
56	0	0.0454545	0	0	0	0	0	0	0	0	0	0	0	0	0	0	0	0	0	0	0	0	0	0	0	0	0	0	0	0	0	0	0	0	0	0	0	0	0	0	0	0	0	0	0	prog
57	0	0	0	0	0	0	0	0	0	0	0	0	0	0	0	0	0.0263158	0	0	0	0	0	0	0	0	0	0	0	0	0	0	0	0	0	0	0	0	0	0	0	0	0	0	0	0	prog+prec
58	0	0	0	0	0	0	0	0	0	0	0	0	0	0	0	0	0	0	0	0	0	0	0	0.0588235	0	0	0	0	0	0	0	0	0	0	0	0	0	0	0	0	0	0	0	0	0	GC-prec
59	0	0	0	0	0	0	0	0	0	0	0	0	0	0	0	0	0.0263158	0	0	0	0	0	0	0	0	0	0	0	0	0	0	0	0	0	0	0	0	0	0	0	0	0	0	0	0	HC-prog
60	0	0	0	0	0	0	0	0	0	0	0	0	0	0	0	0	0	0	0	0	0	0	0	0	0	0	0.166667	0	0	0	0	0	0	0	0	0	0	0	0	0	0	0	0	0	0	BC(subset)-early sAC
61	0	0	0	0	0	0	0	0	0	0	0.0666667	0	0	0	0	0	0	0	0	0	0	0	0	0	0	0	0	0	0	0	0	0	0	0	0	0	0	0	0	0	0	0	0	0	0	INL (late)
62	0	0	0	0	0	0	0	0	0	0	0	0	0	0	0	0	0	0	0	0	0	0	0	0	0	0	0	0	0	0	0	0	0	0	0	0	0	0	0	0.0909091	0	0	0	0	0	AC+HC (mid/late)
63	0	0	0	0	0	0	0	0	0	0	0	0	0	0	0	0	0	0	0	0	0	0	0	0	0	0	0	0	0	0	0	0.0666667	0	0	0	0	0	0	0	0	0	0	0	0	0	Unknown subset
64	0	0	0	0	0	0	0	0	0	0	0	0	0	0	0	0	0.0263158	0	0	0	0	0	0	0	0	0	0	0	0	0	0	0	0	0	0	0	0	0	0	0	0	0	0	0	0	Prog (large early subset)
65	0	0	0	0	0	0	0	0	0	0	0	0	0	0	0	0	0	0	0	0	0	0	0	0	0	0	0	0	0	0	0.0555556	0	0	0	0	0	0	0	0	0	0	0	0	0	0	various
66	0	0	0	0	0	0	0	0	0	0	0	0	0	0	0	0	0	0	0	0	0	0	0	0	0	0	0	0	0	0.5	0	0	0	0	0	0	0	0	0	0	0	0	0	0	0	MG-late
67	0	0	0	0	0	0	0	0	0	0	0	0	0	0	0	0	0	0	0	0	0	0	0	0.0588235	0	0	0	0	0	0	0	0	0	0	0	0	0	0	0	0	0	0	0	0	0	lens
68	0	0	0	0	0	0	0	0	0	0	0.0666667	0	0	0	0	0	0	0	0	0	0	0	0.2	0	0	0	0	0	0	0	0	0	0	0	0	0	0	0	0	0	0	0	0	0	0	INL (early)
69	0	0	0	0	0	0	0	0	0	0	0	0	0	0	0	0	0	0	0	0	0	0	0	0	0	0	0	0	0	0	0	0	0	0	0	0	0	0	0.0666667	0	0	0	0	0	0	Pr-prog?
70	0	0	0	0	0	0	0	0	0	0.2	0	0	0	0	0	0	0	0	0	0	0	0.0232558	0	0	0	0	0	0	0	0	0	0	0	0	0	0	0	0	0	0	0	0	0	0	0	Pr-prec
71	0	0	0	0	0	0	0	0	0	0	0	0	0.0714286	0	0	0	0	0	0	0	0	0	0	0	0	0	0	0	0	0	0	0	0	0	0	0	0	0	0	0	0	0	0	0	0	AC-prog
72	0	0	0	0	0	0	0	0	0	0	0	0	0	0	0	0	0	0	0	0	0	0	0	0	0	0	0	0	0	0	0	0	0	0	0	0	0	0	0	0	0	0	0	0.1	0	AC+GC-prog
