# Supplementary material for: Genomic Analysis of Mouse Retinal Development
Source: PLoS Biol. 2004 Jun 29;2(9):e247. doi: 10.1371/journal.pbio.0020247 (PMC439783; doi:10.1371/journal.pbio.0020247)
Supplement: Table S12 — The SAGE tag corresponding to the transcript in question is listed, along with UniGene numbers, and accession numbers of the probes used for ISH for each candidate noncoding RNA. P-values for BLASTN and BLASTX mouse/human comparisons are shown. Transcripts that show high BLASTN, but low BLASTX, matches to human may represent the best candidates for noncoding mRNAs of functional importance and are indicated as likely to be genuine noncoding RNAs. NS, not significant. (17 KB XLS). [file pbio.0020247.st012.xls]

## Sheet: Sheet1
Table ST12
SAGE tag	Gene	Probe accession number	Mm Accession	Hs Accesssion	Blast N	Blast X	ncRNA?
TACCTTTGTC	135991 ESTs	BE633326	AK013883	AL832650.1	2.00E-40	NS	likely
GATTATTCAA	258150 ESTs	AI425618	AK011787	XM_299912	7.00E-09	NS	likely
TTGCTGGTTT	38582 ESTs	AA860047	AK012876	AK094378	7.00E-57	NS	likely
GGCAGACTGT	194050 ESTs/no obvious ORF	BF449937	AK044422	XM_088347	1.00E-53	1.00E-04	likely
CTTGTAGCTG	44854 ESTs/no obvious ORF	AW050310	AK028326	ND	7.00E-55	NS	likely
GGGAAGATTT	150838 ESTs/15kb 5' of Six3	AW209946	AK044330	ND	e-125	NS	likely
CAAACAGTGA	37607 BC003498 cDNA sequence BC00398	AI846073	NM_030263	NM_018422	8.00E-79	NS	likely
CAGGCAAAAT	151012 ESTs	AW125320	ND	ND	NS	NS	possible
CTCCTGCCAT	182462 ESTs (inside RGS9)	AW533667	ND	ND	NS	NS	possible
TACAAACACA	44702 EST/contained inside rdgB2	AW050046	ND	ND	NS	NS	possible
ACAACTCTGA	131260 ESTs	AI642627	ND	ND	NS	NS	possible
TGGTTACTGG	151553 ESTs	BE984878	AK080586	ND	NS	NS	possible
CAGGGCAGGA	269342 ESTs	AW490107	ND	ND	NS	NS	possible
CATCTAGAGG	188410 ESTs	BE994660	ND	ND	NS	NS	possible
CCCTGAATAA	130902 ESTs	AA616812	AK037284	ND	NS	NS	possible
AAATGTAAAT	32434 ESTs/no predicted gene	AA189760	ND	ND	NS	NS	possible
TTTAGACCAG	150542 ESTs	BE949265	BI732599	ND	NS	NS	possible
GCCCCCAATG	196727 ESTs	AI841594	AK004167	ND	0.000006 (contains repeat)	NS	possible
AGGAGCAAGC	150554 EST	BE949356	ND	ND	NS	NS	possible
