# Supplementary material for: Genomic Analysis of Mouse Retinal Development
Source: PLoS Biol. 2004 Jun 29;2(9):e247. doi: 10.1371/journal.pbio.0020247 (PMC439783; doi:10.1371/journal.pbio.0020247)
Supplement: Table S13 — Chromosomal localizations are shown for both the mouse genes and their human orthologs. Genes located within chromosomal intervals containing mapped but uncloned retinal disease genes are indicated by the name of the disease (terminology from Retnet; http://www.sph.uth.tmc.edu/Retnet/disease.htm). User-curated cellular expression data of the genes in question (derived from Table S6) are shown to aid in prioritizing candidate disease genes for further investigation. ND, not determined. (291 KB XLS). [file pbio.0020247.st013.xls]

## Sheet: Sheet1
Table ST13
SAGE tag	Gene	Accession number of probe	Early	Mid	Late	Mm Chr_location	Mm Accession	Hs Chr_location	Hs Accession	Disease genes in interval
AACTTGCAAT	100060 ethanolamine-specific kinase	AI853226	O	scO	P	6 G3	ND	12p12.1	NM_018638
CTCCAGGGCA	259625 ESTs	AI851770	O	O	I	1	---	NULL	NULL
GCAAGAGAGA	2338 glutamine synthetase	AI848786	O	vO	M	1	NM_008131	1q31	NM_002065	ARMD1/AXPC1
TATAAACACT	39565 similar to rab6 GTPase activating protein]	AI841632	n	vO	n	1	AK020007	1q24-q25	NM_014857	CORD8/ARMD1
none	159861 dystonia	BI732405	n	n	PrI	1	AK020813	6p12-p11	NM_001723
CAGATAGAGC	36606 5630401H01Rik RIKEN cDNA 5630401H01 gene	AI854371	P	scI(p)	PrI	2	AK077144	ND	ND
AGCAGAGAAT	101587 phosphatidic acid phosphatase type 2B	AI848415	O	scI(o)	sA	2	AK004510	1p32.2	NM_003713
GGGGTTGGGG	295606 ESTs/weakly similar to bacterial permeases	BE685719	O	vO(o)	PrI	2	AK038928	ND	ND
CGGTGAGACA	184711 ESTs	AI430084	O	O	n	2	AK049087	20q13.33	NM_024883
CATCTAGAGG	188410 ESTs	BE994660	O	vO(o)	M	2	ND	ND	ND
GACTGTCTAC	263210 ESTs	AI847159	n	O	Pr	2	BG342719	ND	ND
none	95741 PR domain containing 1, with ZNF domain	AW825066	?	O	P	2	AK020807	10p12.31	ND
CCTTGTACAT	23176 ESTs	AI839767	P	P	P	3	BC004805	3q26.2	NM_005414.1
GATTATTCAA	258150 ESTs	AI425618	O	scI(o)	PrB	3	AK011787	8q12.3	XM_299912
ACTGGTGCGC	137286 NSCL-2	AI849548	O	scI(o)	A	3	ND	1p12-p11	NM_005599
GGATTCTAGA	28651 Muscleblind-like protein MBLL39	BE652861	O	vO	PrBsG	3	NM_020007	3q25	NM_021038
TTCTTTCCGC	141993 muscleblind-like 1	AI854176	O	O	PrI	3	NM_020007	3q25	NM_021038 // muscleblind-like
GATTTCTGTC	140804 guanine nucleotide binding protein (G protein), gamma 5	AI894315	I	vO	A	3	BC010725	1p22	NM_005274
TAAAGCCGAT	260791 ESTs	BE630930	?	O	PrI	3	BC025067	8p12	ND
GCGATCTGCC	143811 Basic helix-loop-helix domain containing, class B5	BE115766	?	O	PrB	3	NM_021560	8q13	NM_152414
GATACCATTA	1779 Sterol carrier protein 2, liver	AI850717	sO	vO	Pr(is)M	4	---	1p32	NM_002979
ACTAACTGTG	12145 retinoblastoma binding protein 4	AI153173	scI	svO(o)	PrI	4	NM_009030	1p34.3	NM_005610
CACTAGTTTG	38993 ESTs/calsyntenin 1	AI837092	O	O	PrI	4	NM_023051	1p36.22	NM_014944	LCA9
TGGACATTTG	39864 ESTs	AI848122	I(o)	scI(o)	sA	4	BU756044	ND	ND
TTGGGGAACC	3459 D site albumin promoter binding protein	AI842290	?	vO(o)	sB	4	NM_016974	19q13.3	NM_001352
ATGTTCTGAC	12553 Replication factor C (activator 1) 3 (38 kDa	BF462036	sO(i)	vO	I	5	BC026795	13q13.2	NM_002915 // replication factor C 3, 38kDa isoform 1
GCCCCCAATG	196727 ESTs	AI841594	P	P	I(p)	5	AK004167	ND	ND
TCAGCAGAGG	200912 PKAbeta	AW496459	O	O	PrI	5	NM_031869	12q24.1	NM_006253
GCTGCCTGGT	35691 FGFR5	AI843113	O	O	Pr(is)I	5	NM_054071	4p16	NM_021923	STGD4/MCDR2
TTACCCACCT	131653 ESTs/no obvious ORF	BB278467	n	?	Pr	5	AK044281	ND	ND
TTGTTCCAAT	29412 nuclear receptor co-repressor 2	AI605781	I	scI	I	5	NM_011424	12q24.31	NM_006312 // nuclear receptor co-repressor 2
TACAAACACA	44702 EST/contained inside rdgB2	AW050046	?	P	PrI	5	ND	ND	ND
None	151121 ESTs	BM937383	vO	O	PrI	6	ND	ND	ND
CAGGCAAAAT	151012 ESTs	AW125320	O	O	PrI	6	ND	ND	ND
TGGACCTGGG	212854 fibroblast growth factor 3	BF466513	sO(o)	I(o)	?	7	NM_008007	11q13.1	XM_291913	VRNI
GTACCTGTCT	35087 ESTs, Highly similar to rA9 C-terminal binding protein	AW047707	P	O	PrI	7	BC039628	11p15.5	XM_290536	AA
GATTTCAGTG	29496 ESTs, Highly similar to AF039942_1 HCF-binding transcription factor Zhangfei [H.sapiens]	BE656611	O	vO	B	7	AK004085	11q14	NM_021212
TTGATATGGT	33776 ESTs	AW495162	O	O	M	7	ND	20q11.23	ND
AGGAGATGGA	246240 TRABID	AI854824	?	svO(o)	Pr	7	AK005926	10q26.13	NM_017580
CTAGCCTGGG	269061 ESTs	AI007199	?	?	PrI	7	AK080723	19p13.11	XM_048457
TGGTCTCTTA	239070 ESTs	AI836856	?	P	PrB	7	NM_198631	19q13.32	AB028987
TGGTTACTGG	151553 ESTs	BE984878	P	O	I(pr)	8	AK080586	22q13.31	AB051431
CGGAAACTGC	46675 ESTs	AA499290	O	vO	I	8	AK129197	ND	ND
TCCTATTAAG	134224 ESTs, Weakly similar to A55817 cyclin-dependent kinase p130-PITSLRE - mouse [M.musculus]	BI871938	sO	scI(o)	A	9	AK020935	ND	ND
ATGAAATCAA	274830 Pik3r4 Phosphatidylinositol 3 kinase, regulatory subunit	BC017537	O	vO	Pr(is)	9	BC017537	3q22.1	XM_209440
TACCTTTTCT	160830 ESTs	AI851319	O	O	Pr	9	XM_150148	ND	ND
ACCTTGTGAA	20425 bassoon	AI836567	I(o)	I(o)	sA	9	NM_007567	3p21.31	NM_003458
ACAGGTCCAC	34042 nuclear factor I/C	AI849075	O	vO	PrI	10	AK005387	22q13.31	ND
TGCTTAAGCA	189975 2610036L11Rik RIKEN cDNA 2610036L11 gene	W09175	O	O	PrI	10	BC050071	ND	ND
none	45759 nav-3/unc-53 homolog	AI849399	I(sO)	I(o)	sAG	10	BC046396	12q21.2	NM_014903
ACACAATCCA	35405 ESTs	BF020616	?	O	Pr	10	AK044010	ND	ND
ACAACTCTGA	131260 ESTs	AI642627	sO	n	n	11	ND	ND	ND
TGTTAAGATG	258525 chromobox HP1	BE851851	P	O	PrI	11	AK080243	ND	ND
GCATTGCAAA	28624 DNA segment, Chr 11, ERATO Doi 707, expressed	AW123377	O	O	PrI	11	NM_025918	17q21.31	NM_144609	CORD4
none	28509 Slit3	AI853254	O	vO(o)	M	11	XM_203363	5q35	NM_003062
CTCCTGCCAT	182462 ESTs (inside RGS9)	AW533667	?	P	PrI	11	ND	17q23-q24		CORD4
GAAGCGTGTG	117022 AF180470	BF719112	O	O	PrI	12	AB093248	2p25.1	NM_014668
TGGAGGCTCC	41702 Sox11	AI835269	n	n	PrI	12	NM_009234	2p25	NM_003108
AGATTGCAAA	11660 clone MGC:25444	BE988175	I(o)	scI(o)	A	12	AK034313	ND	ND
GTGGTACATA	76762 ESTs	AI848465	I	scI(o)	P	13	BC048855	ND	ND
TGGGAAATGA	34385 KIAA1376/upregulated by 1,25-dihydroxyItamin D-3; thioredoxin interacting factor homolog	AI847396	I	vO	PrI	13	NM_178917	5q14.3	XM_033042	WGN1/USH2C
GTGGTGCATA	196585 SKB1 homolog	BE953658	sO(o)	O	I(pr)	14	NM_013768	14q11.2	NM_006109 // SKB1 homolog	MCDR4/ACHM1
ACGTGGCAAG	65309 ESTs	BE686333	O	O	PrB	14	AK003597	13q13.3	NM_032138
TTGCTGGTTT	38582 ESTs	AA860047	O	O	PrI	14	AK012876	14q32.31	AK094378	ACHM1/MCDR4/USH1A
ACCATTCTTC	45286 Suppressor of Ty 16 homolog	AI851830	?	P	P	14	NM_033618	ND	ND
TACCTTTGTC	135991 ESTs	BE633326	P	?	PrI	16	AK013883	16p13.2	AK057657
TTTCCATCTC	35159 ESTs	AI853191	?	O	Pr	16	AK020802	ND	ND
TGGAACGATA	45160 0710001D07Rik RIKEN cDNA 0710001D07 gene	AW049253	O	O	PrI	17	AK002941	6p21.2	ND
CACATACCCA	258115 ribosomal protein?	BF021004	O	O	MPrA	17	BC023719	ND	ND
TTTAGACCAG	150542 ESTs	BE949265	O	vO(o)	Pr	17	BI732599	ND	ND
AGACTCTGCC	139204 ESTs/MHC	BF662424	O	O	Pr	17	ND	ND	ND
ACGGGCTCAC	41220 1700023F20Rik RIKEN cDNA 1700023F20 gene	AW492441	O	O	PrI	17	ND	Xq28	NM_152274
GATGTGTAAA	206186 ESTs	AI842442	?	vO(I)	PrB	17	NM_024442	19p13.12	NM_007253
TTTGTCACCA	38912 2410129H14Rik RIKEN cDNA 2410129H14 gene	AI853381	P	I(o)	sA	18	NM_175245	13q22.1	BC013405.1
CAGGGCAGGA	269342 ESTs	AW490107	O	O	PrI	18	ND	ND	ND
TCTGGAGACA	171236 ESTs/protocadherin gamma C4	AU018705	?	O	Pr	18	NM_033582	5q31	NM_018928
AGGGAATCTG	288614 ESTs	AI847802	sO	scI(o)	PrA	19	AK004010	11q12.3	ND
AAAGATCTGT	260567 RNA, U22 small nucleolar	AI414380	P	vO(o)	PrI	19	U40654	11q13	L36588	VRNI
GTGGAAATGG	297142 ESTs	AW495047	O	O	PrI	19	ND	ND	ND
TCTTGGCTTC	41284 ESTs/Ig domains	AI849496	sscO	vO	B	1	XM_131808	1p36.13	NM_032880	LCA9
TACCTATTAA	28152 ESTs/novel protein kinase	BF179218	O	O	Pr	1	ND	1q23.3	NM_018186	CORD8
AGATGTGTAT	122222 Lhx4	BE948639	n	vO	B	1	NM_010712	1q24.3	AK026422	CORD8
CTGCCGGCCC	214530 Immunoglobulin superfamily, member 9	BC024487	I+sO(p)	scI(p)	AG(p)	1	NM_033608	1q22-q23	NM_020789	CORD8
CTTATTAAAA	87130 ESTs/KIAA1411	BG403994	sO	O	sB	1 A5	NM_026604	6q13	NM_020819	RP25/LCA5
ATGGCTTAAT	28909 protein tyrosine phosphatase PRL-1	AA178624	O	O	n	1 B	NM_011200	6q12	NM_003463 // protein tyrosine phosphatase type IVA, member 1	RP25/LCA5
TGACAATTTT	56167 Prkcn protein kinase C, nu	AI836106	I	vO	AH	1 B	NM_018872	2q11.2	NM_018497 // hypothetical protein PRO1048
ATTCCGAAGA	2380 neuronal PAS domain 2	AA220577	?	O	P	1 B	NM_008719	2q11.2	NM_002518
GCCAAACCAA	1761 CDC-like kinase	AA388975	O	vO	I	1 C1.3	NM_009905	2q33	NM_004071 // CDC-like kinase 1	RP26
AGGCTTCTTA	226787 GRIF-1	AA265946	O	O	PrI	1 C1.3-C2	NM_172406	2q33	NM_015049	RP26
TACCAGCACA	245166 A630041P07Rik: RIKEN cDNA A630041P07 gene	BG092839	O	O	Pr(is)I	1 C2	NM_018868 // nucleolar protein 5	2q33.2	NM_015934	RP26
none	150813 frizzled homolog 5 (Drosophila)	AF272146	O	svO	M	1 C2	NM_022721	2q33-q34	NM_003468	RP26
GGTTTCCCCT	101838 ESTs	AW490767	O	O	PrI	1 C2	NM_145143	2q33.2	NM_033066	RP26
TGGGTTTGAG	111887 CARF	BE457506	?	O	PrB	1 C2	NM_139150	2q33.3	NM_024744	RP26
GAAAATGCAT	40059 ESTs	BE986603	O	O	IsA	1 C3	BC042720	2q34	ND
TTTTTCAATC	32545 MAP2	AI854858	I	I	AG	1 C3	NM_008632	2q34-q35	NM_002374
GAATTGATGA	5038 secretogranin II	AW124973	sscI	sscI	sA	1 C4	NM_009129	2q35-q36	NM_003469
none	5130 wnt10a	AW049702	sO	svO	I(pr)	1 C4	NM_009518	2q35	NM_025216
CTGGGAGTTG	153833 ESTs	AW046681	O	O	M	1 C4	NM_009872	2q35	NM_003936
CTGGGTTTTT	103809 Rcd1 (required for cell differentiation)	AW045377	I(vo)	O	Pr(is)I	1 C4	NM_021383	2q35	NM_005444
GTTAAAAAAA	1155 tubulin alpha 4	AI839739	I(o)	I(o)	G	1 C4	NM_009447	2q36.1	NM_025019
AAGGCCACAG	4032 REGULATED ENDOCRINE SPECIFIC PROTEIN 18	AI851012	?	?	n	1 C4	NM_009049	2q36.1	XM_300831
TGTTGTACCT	154303 similar to A-kinase anchor protein 11	AI852220	P	O	PrI	1 C5	NM_172430	2q36	XM_051221
CTGCAAAACC	41576 Kif5c	BE991877	P	O	M(pr)	1 D	BC026953	2q23.3	NM_004522
CCGCTGCGTG	29549 Hes6 Hairy and enhancer of split 6	AW048812	P	scI(o)	?	1 D	NM_019479 // hairy and enhancer of split 6	2q37.3	NM_018645
GTTGTAAATA	28965 ESTs, Highly similar to PROTEIN PHOSPHATASE 2C HOMOLOG 3 [Schizosaccharomyces pombe]	AA856470	P	vO+I	?	1 D	NM_023343	2q37.3	NM_030768
GTGTGGTCAC	29667 ESTs, Highly similar to AF132970_1 CGI-36 protein/contains lin-15-like Zn finger	AI854547	O	O	Pr	1 D	NM_025920 // RIKEN cDNA 2010320B01	2q37.3	NM_015963 // CGI-36 protein
AGCATTCCTC	1276 retinal S-antigen	AI839178	n	n	Pr	1 D	NM_009118	2q37.1	NM_000541 // S-arrestin
AGTACTCGAA	28761 Serine/threonine kinase 25	AI647047	I	I	AG	1 D	NM_009118	2q37.3	NM_006374
TACAGTATAA	3092 inhibin beta-B	AW762548	sscO	sscO-svO	none	1 E2.3	BC048845	2cen-q13	NM_002193 // inhibin beta B subunit precursor
TATTTGTCTT	28654 ESTs, Weakly similar to CG8195 gene product [D.melanogaster]	BE308346	O	O	Pr	1 E3	NM_028787	2q14.1	NM_025181
AGGGGCCAGA	28629 RAB3 GTPase-ACTIVATING PROTEIN	BE947192	I(vo)	scI(o)	Pr(is)I	1 E3	NM_178690	2q21.3	XM_040048
TGATTGTGCT	259976 N-acylaminoacyl-peptide hydrolase	AI841275	P	scO	Pr	1 E4	NM_028320	1p36.13-q41	NM_015999 // CGI-45 protein	LCA9
CTTAAATCTT	903 B-cell translocation gene 2, anti-proliferative	AI851775	O	O	P	1 E4	NM_007570	1q32	NM_006763 // B-cell translocation gene 2	AXPC1
TATTTTTCTA	27495 Importin 9	AI842118	O	vO	PrI	1 E4	XM_129442	1q32.1	NM_018085	AXPC1
TTCTCTTCTC	200894 ESTs/KIAA0306 (cytoskeletal)	AI850859	?	O	PrI	1 E4	NM_175294	1q32.1	NM_022731	AXPC1
TGAAGAATAC	259254 Rnasel Ribonuclease L (2', 5'-oligoisoadenylate synthetase-dependent)	AW494697	?	vO(o)	PrI	1 G2	NM_011882	1q25	NM_021133	ARMD1
TTATATTCTT	181709 regulator of G-protein signaling 16	AA288620	O	vO	I	1 G3	NM_011267	1q25-q31	NM_002928	ARMD1/AXPC1
CACAAGGCAC	275948 Interferon alpha responsive gene, 15 kDa	AI853475	?	O	Pr	1 G3	NM_022329	1q25.1	NM_022347	ARMD1
CCAGCCTGTG	3869 paired related homeobox 1	AI838291	O	O	PrI	1 H2.1	NM_011127	1q24	NM_006902	CORD8
CATTGTAGGC	248642 Peg13 paternally expressed 13	AI429810	P	P	P	1 H3	AY151253	1q22	NM_005598	CORD8
CTGCTGAGCC	2474 nescient helix loop helix 1	BF318656	P	vO(p)	n	1 H3	NM_010916	1q22	NM_005598 // nescient helix loop helix 1	CORD8
TCAACTTAAA	6393 Duffy blood group	AI838944	O	sscO-scI	I+A	1 H3	NM_010045	1q21-q22	NM_002036 // Duffy blood group	CORD8
TTGTAGGAAG	29860 Igsf8 immunoglobulin superfamily, member 8	AI840813	O	scI(o)	A	1 H3	NM_080419	1q23.1	NM_052868	CORD8
CCCACCCCCC	158631 4933428F06Rik RIKEN cDNA 4933428F06 gene	AW050070	O	O	PrIn	1 H4	NM_177757	1q44	XM_352939
AGCCCTGGAT	45194 ESTs	BE686297	P	I(o)	PrI	1 H6	NM_178632 // RIKEN cDNA 5930412E23	1p36.13-q42.3	NM_015434 // DKFZP434B168 protein	LCA9
TGTTTTCACC	205569 Ppp2r5a protein phosphatase 2, regulatory subunit B (B56), alpha isoform	BI733539	O	vO(o)	PrI	1 H6	NM_144880	1q32.2-q32.3	NM_006243	AXPC1
TGAACCTTAT	103712 ESTs/protein of unknown function	BM937168	?	O	Pr	1 H6	NM_023727	1q32.3	NM_183059	AXPC1
TGTCTCTGTC	261259 Hypothetical protein MGC41284	BE691484	?	O	Pr	1 H6	NM_153137	1q32.3-q41	NM_025228	AXPC1
AGAAATAAAT	286834 ESTs/bicaudal C (RNA bp)	AI852358	n	O	Pr	10	AK015956	6q14.1	ND	RP25/LCA5/MCDR1
AATAAAAGAA	213213 HK-R	BC016235	n	vO	M	10	NM_145419	10q21.1	NM_025130	RNANC
none	9213 ERalpha	AI325343	O	O	PrI	10 A1	NM_007956	6q25.1	NM_000125	RCD1
CAAGTGGAAA	28209 Mus musculus p53 apoptosis-associated target (Perp) mRNA, complete cds	AI854029	?	O	Pr	10 A2	NM_022032	6q24	NM_022121
ACCCTGGCTT	116683 tumor necrosis factor, alpha-induced protein 3/probable DNA-binding protein A20	BE849027	O	O	Pr(is)	10 A3	NM_009397	6q23	NM_006290
CTGCTAGCTA	52109 myeloblastosis oncogene	AA275276	O	vO	?	10 A3	NM_010848	6q22-q23	NM_005375
GGTTATAATA	28405 serum/glucocorticoid regulated kinase	AI854349	CM	CM	Pr(is)	10 A3	NM_011361	6q23	NM_005627
TAAAACTAAC	814 Epb4.1l2 erythrocyte protein band 4.1-like 2	AI845287	O	O	MPr	10 A4	NM_013511	6q23	NM_001431 // erythrocyte membrane protein band 4.1-like 2
TTAGACAAAA	87704 ESTs/desmoplakin paralog?	BE994612	I(vo)	scI(vO)	PrI	10 A4	XM_125551	6q22.33	NM_014702
CATTTCCCAA	27530 ESTs	BE948591	O	O	PrI	10 B1	NM_027442	6q22.1	NM_003649
CTTTATGTGA	19806 histone deacetylase 2	AA451281	I(o)	vO	A	10 B1	NM_008229	6q21	NM_001527
GCATCCTGTT	249934 signal transducer and activator of transcription 3	AI837104	I	I(o)	I(pr)	10 B1	NM_009433	6q22-q23	---
TTATGGAATT	6417 CD24a antigen	AA199464	I	vO	M	10 B2	NM_009846	6q21	NM_013230
TTTGTTAAAA	21697 latent transforming growth factor beta binding protein 3	AI849939	O	vO(o)	PrI	10 B3	NM_029083	10pter-q26.12	NM_019058
AAAATGCCTT	151918 Minichromosome maintenance deficient domain containing 1	BE988262	O	O	PrI	10 B3	XM_125626	6q22.31	NM_153255
TGTCCTGTTT	6698 SAR1a gene homolog (S. cereIsiae)	BF462250	vO	vO	PrI	10 B4	NM_009120	10q22.2	NM_020150
GGATTTTGAT	3644 Fatty acid binding protein 7, brain	AI894027	sO	svO	M	10 B4	NM_021272 // fatty acid binding protein 7, brain	6q22-q23	NM_001446 // fatty acid binding protein 7, brain
TATTTGTCTT	245867 inositol polyphosphate multikinase	BG147431	O	O	Pr(is)I	10 B5.2	XM_125641	10q21.2-q21.3	NM_152230	RNANC
AGTTAAATCC	181061 ESTs, Moderately similar to HYPOTHETICAL PROTEIN KIAA0273	AI836662	I	I-vO	AG+I	10 B5.3	NM_024244	10q21.3	XM_166142	RNANC
TCTGTTTCTG	3406 transcription factor E2a	AI845516	O	vO	n	10 C1	BC018260	19p13.3	NM_003200 // transcription factor 3
AAGGTCTGCC	2400 glutathione peroxidase 4	AI850040	O	O	PrI	10 C1	NM_008162	19p13.3	NM_002085
TCTAACCTCA	3251 Proprotein convertase subtilisin/kexin type 4	AI834937	O	O	PrB	10 C1	NM_008793	19p13.3	NM_017573
ACTCCTGTCA	18834 ESTs, Moderately similar to PWP1_HUMAN PERIODIC TRYPTOPHAN PROTEIN 1 HOMOLOG [H.sapiens]	BF463891	O	O	PrI	10 C1	NM_133993	12q24.11	NM_007062
GGGATGGATG	45099 ESTs, Moderately similar to R31341_1 [H.sapiens]	AW120537	O	O	PrI	10 C1	NM_134009	19p13.3	NM_020170
CAGCATAAAT	29665 Dip3b Dip3 beta	AW124910	O	O	I	10 C1	NM_145220	12q24.1	NM_018171
TAGCCTAGGC	4022 1110033C18Rik RIKEN cDNA 1110033C18 gene	BE944037	I(o)	I(o)	I(pr)	10 C1	NM_133964 // RIKEN cDNA 1110033C18	19p13.3	NM_031304 // hypothetical protein MGC4293
CATACTCCAT	17898 cold inducible RNA-binding protein	AI838985	I	I(o)	PrI	10 C1	NM_007705	19p13.3	NM_001280
GCCCTGCTGG	42126 MAP kinase-interacting serine/threonine kinase 2	AA271968	I	vO(I)	A	10 C1	NM_021462 // MAP kinase-interacting serine/threonine kinase 2	19p13.3	NM_017572
ACAATAAACA	182281 ESTs, Weakly similar to coded for by C. elegans cDNA cm21e6 [C.elegans]	AI848423	?	O	P	10 C1	BC038699	19p13.3	NM_174983
GGAGGGTGTG	28873 phosphatidic acid phosphatase type 2c	AI853126	?	I+vO	A	10 C1	NM_015817	19p13	NM_003712
TGACTGTCTG	143816 poly(rC)-binding protein 3	AW048741	?	?	Pr(is)	10 C1	NM_021568	21q22.3	NM_020528
CACCTGCCTC	282891 1-acylglycerol-3-phosphate O-acyltransferase 3	AI839508	?	O	Pr(is)	10 C1	NM_053014	21q22.3	NM_020132
AAGGTGCACG	28147 Deleted in polyposis 1-like 1	AA914367	?	O	Pr(is)	10 C1	NM_139292	19p13.3	NM_138393
GAGGGTTGAC	17613 ESTs/probable SNK/polo-like kinase	AW048815	?	O	PrB	10 C1	NM_183152	19p13.3	XM_059051
AGCACCTGTC	260578 ESTs	AI841777	?	?	Pr(is)M	10 C1	XM_196005	21q22.3	NM_021941
TGTAGGCTGT	4871 Timp3 tissue inhibitor of metalloproteinase 3	AI841798	?	O	PrI	10 C1-D1	NM_011595	22q12.3	NM_000362
TCACAGCTGT	16596 B-cell translocation gene 1, anti-proliferative	AI848411	O	O	PrI	10 C2	NM_007569	12q22.33	NM_001731
GTGATGTAAT	124 thymopoietin	AW046443	O	vO(o)	PrI	10 C2	NM_011605	12q22	NM_003276 // thymopoietin
CAGTGGGCTT	45843 NTT7	AW120686	sO	vO	n	10 D1	NM_175328 // expressed sequence AA536730	12q21.31	NM_018057 // homolog of rat orphan transporter v7-3
TAAGTGTGAC	4235 kit ligand	BC011322	sI	svI	sG	10 D1	NM_013598	12q22	NM_000899
GACACTCAAT	5101 synaptotagmin 1	AI836797	I	I	AG	10 D1	NM_009306	16q22.1	NM_025082
GACACTCAAT	5101 Syt1 synaptotagmin 1	AI852915	?	I(o)	AG	10 D1	NM_009306	12cen-q21	NM_005639
GTATTTATCT	222520 cleavage and polyadenylation specific factor 6, 68kD subunit	BE447958	O	O	I(pr)	10 D2	BC031189	12q14.3	NM_007007
CACGACCTCA	3771 Protein tyrosine phosphatase, receptor type, R	H52494	O	O	Pr	10 D2	NM_011217	12q14.3	NM_002849
GCTCCCTCTG	43640 ESTs	AI835484	I(o)	scI(vO)	PrI	10 D2	XM_147434	12q15	XM_039395
TGGAATAAAT	2003 mdm-1 nuclear protein	AW321423	?	O	Pr(is)	10 D2	NM_010785	12q14.3	NM_017440
GGAAGTGTTG	45565 1810038L18Rik RIKEN cDNA 1810038L18 gene	AA386436	?	scO(o)	Pr	10 D2	XM_147451	12q14.3	NM_003583
TGGCCTGAGT	27862 ESTs, Weakly similar to Nucleoside diphosphate kinase	AI844191	O	O	n	10 D3	BC052791	12q13.13	NM_144576
TGATGTTCCA	252213 BAZ2A	AW046837	O	O	Pr	10 D3	NM_054078	12q24.3-qter	NM_013449
TCCAGTAAAG	7549 DNA-damage inducible transcript 3	AI840919	ND	O	P	10 D3	NM_007837	12q13.1-q13.2	NM_004083
none	4426 Cd63 antigen/tetraspannin	AI838302	CM	CM	n	10 D3	NM_007653	12q12-q13	NM_001780
AATGTGTATG	291791 ESTs	AI843354	?	P	PrI	10 D3	NM_025364	12q13.13	NM_033082
AGGTCCTCAG	22682 ESTs, Moderately similar to PHOSPHATIDYLINOSITOL-4-PHOSPHATE 5-KINASE TYPE II [Homo sapiens]	AI851871	?	?	Pr(is)B	10 D3	NM_054097	12q13.2	NM_024779
TGGCCTTTGA	103724 similar to calcium channel, voltage-dependent, gamma subunit 4	AI844183	sO+sI	scI	A	11	NM_019431	17q24	NM_014405	CORD4
TTCCCTGACA	103727 low-affinity NGF receptor	BF179450	scI	vO	n	11	NM_033217	17q21.33	NM_002507	CORD4
ATCCGCTCTG	34858 ESTs/PKC alpha	AI838164	n	svO	sB	11	NM_011101	17q22-q23.2	NM_002737	CORD4/RP17
ACCTTATTAA	34598 cytoglobin	AI846736	n	scI-vO-scO	Pr(is)	11	NM_030206	17q25.3	NM_134268	CORD4
GCTGCCTTGT	33118 ESTs/novel rdgB2 homolog	AI848332	n	scO	Pr	11	NM_144526	17p13.2	NM_019013	CACD
GCAATGCAAA	35817 ESTs/KIAA1001 (contains multiple WD repeats)	BE689314	I(o)	vO(o)	M	11	NM_145940	17q24.3	NM_017983	CORD4
TGAAGGGGGA	206085 ESTs/neurabin paralog	AI854782	I	scI(o)	A	11	NM_146025	17q21.33	NM_174920	CORD4
TAACCGTTTT	24640 Growth factor receptor bound protein 10	AA981661	sO(o)	vO	M	11 A1	NM_010345	7p12-p11.2	NM_005311
ACCCGCCGGG	17461 serine/threonine kinase 16	AI835611	O	O	I(pr)	11 A1	NM_011494 // serine/threonine kinase 16	2q34-q37	NM_003691 // serine/threonine kinase 16
ACTTCTGTTG	12906 Mus musculus aromatic-L-amino-acid decar	AI838895	n	n	sA	11 A1-A4	NM_016672 // dopa decarboxylase	7p11	NM_000790
TGCATTAAGA	76694 1110067D22Rik RIKEN cDNA 1110067D22 gene	AI842077	O	O	PrI	11 A3.1	NM_173752 // RIKEN cDNA 1110067D22	2p13.3	NM_014181 // HSPC159 protein	RP28
TCACTAACCC	189429 RIKEN cDNA 4930430E16	AI613936	?	O	Pr	11 A3.2	XM_203573	2p15	AK023367	RP28
ATGAGTCTGT	27885 ESTs, Weakly similar to CG14367 gene product [D.melanogaster]	AI850505	O	O	I(pr)	11 A3.3	NM_025740	2p16.2	NM_080667	RP28
CTTTTTATAC	255044 Pantothenate kinase 3	BE850200	I(o)	O	PrB	11 A4	NM_145962	5q34	NM_024594
GGCCGCGTTC	35439 SPARC	AW990833	?	svO-Bv	MPr	11 B1	NM_009242	5q31.3-q32	NM_003118
GATGTGTACG	4366 early B-cell transcription factor	AW519622	I(o)	I(o)	PrA	11 B1.1	NM_007897	5q34	NM_024007
GAAGAAAATG	2672 mannoside acetylglucosaminyltransferase 1	AI840067	?	O	Pr(is)	11 B1.2	NM_010794	5q35	NM_002406
GCTCAGCTTA	53435 hypothetical protein, clone 2-24	AI853087	sO+scI	vO+scI	sB+sA	11 B1.3	NM_022423	1q42.13	XM_047499
TTTTATTTGT	258146 Mus musculus mRNA for ras-GTPase-activating protein SH3-domain binding protein, complete cds 34012 ESTs	AI049055	sO	svO	I	11 B1.3	NM_013716	5q33.1	NM_005754 // Ras-GTPase-activating protein SH3-domain-binding protein
ACAACTTCCT	285928 GM2 ganglioside activator protein	BF464321	P	vO	M	11 B1.3	NM_010299	5q31.3-q33.1	NM_000405
none	200358 TCF-1	BF135705	CM	CM(o)	n	11 B1.3	NM_009331	5q31.1	NM_003202
AAGGTCTCTG	16533 Polymerase (RNA) II (DNA directed) polypeptide A	AI853301	?	P	P	11 B1-C	NM_009089	17p13.1	NM_000937	CACD
TATCTCTGGA	30602 Ubiquitin thiolesterase 22	BE988838	I(vo)	O	PrI	11 B2	BC058419	17p11.2	---
GGTATGTTAT	88061 NCoR1	BE944673	?	scI	A	11 B2	NM_011308	17p11.2	NM_006311
TTGAGGGTGG	5114 Dvl2 dishevelled 2, dsh homolog (Drosophila)	AI853388	O	O	M	11 B3	NM_007888	17p13.1	NM_004422	CACD
TTTTTGAAAA	3488 Aurkb aurora kinase B	BF466136	O	vO	Pr	11 B3	NM_011707	17p13.1	NM_004217 // serine/threonine kinase 12	CACD
GTTTTAATTG	89579 Mannose-P-dolichol utilization defect 1	AI839143	O	O	A	11 B3	NM_011900 // mannose-P-dolichol utilization defect 1	17p13.1	NM_004870 // mannose-P-dolichol utilization defect 1	CACD
TGCCCTCGCC	39265 0610010K14Rik RIKEN cDNA 0610010K14 gene	AI848107	O	vO(o)	I	11 B3	NM_026694 // /// NM_026757 // RIKEN cDNA 1110020A23	17p13.1	BC040036	CACD
GTGCGCTAGA	29852 ESTs, Weakly similar to cDNA EST EMBL:D72691 comes from this gene [C.elegans]	AI836548	O	O	I	11 B3	NM_173742	17p13.2	XM_353131	CACD
CTTATCACCC	268680 P101-PI3K	BF662402	O	O	PrI	11 B3	NM_177320	17p13.1	NM_014308	CACD
AATACTGACT	28073 mum-2	AI835788	O	O	n	11 B3	XM_126252	17p13.2	NM_021210	CACD
AAAGCACCCG	156241 GC-E	AI715125	?	O	PrI	11 B3	NM_008192	11p15.4 11q13.5	ND
CCAGCCTGAA	235204 ESTs/Na-K ATPase beta 2 subunit	AI845260	?	scO(p)	Pr(is)sA	11 B3	NM_013415	17p13.1	NM_001678	CACD
ATCCCAACCT	143774 Ran nuclear exchange factor	BE309790	?	O	P	11 B3	NM_021329	17p13	NM_014185	CACD
GTTTTCATTT	267395 5730408C10Rik RIKEN cDNA 5730408C10 gene	AI840160	O	O	?	11 B4	NM_027445 // RIKEN cDNA 5730408C10	17p13.3	NM_015528 // DKFZP566H073 protein	CACD
GATATTAAAA	54359 Tumor necrosis factor (ligand) superfamily, member 13	BE631332	none	O	Pr	11 B4	NM_023517	17p13.1	NM_003808	CACD
TCTGATGGAA	27768 ESTs	AI840276	I	I	sA	11 B4	NM_134022 // UGS148 protein	17p13.2	NM_021730	CACD
AGTGGAAGGT	27256 discs large homolog 4	AI450221	?	I(o)	PrI	11 B4	NM_007864	17p13.1	NM_001365	CACD
GCTAAGGCTT	10313 ankyrin repeat hooked to zinc finger motif	AI847131	sO(O)	O	Pr	11 B4	NM_009671	17p13.3	NM_016376	CACD
AAGCTCAGTT	142275 cdk5 regulatory subunit/p35	AI852761	P	vO	PrI	11 B5	NM_009871	17q12	NM_003885	CORD4
GTGTGCCAGG	3667 Vitronectin	AI854511	P	P	Pr(is)	11 B5	NM_011707 // vitronectin	17q11	NM_000638 // vitronectin precursor	CORD4
TGACTTTTCT	12236 zinc finger protein 207	AI851624	P	O	Pr(is)	11 B5	NM_011751 // zinc finger protein 207	17q11.2	NM_003457 // zinc finger protein 207	CORD4
GACCATTGCA	35063 1810009O10Rik RIKEN cDNA 1810009O10 gene	BF660551	O	O	PrI	11 B5	BC027022	Xq28	NM_152274
TTAGAGGTTC	33962 cytokine receptor-like molecule 9	AI851451	O	O	PrI	11 B5	NM_018776 // cytokine receptor-like factor 3	17q11.2	NM_015986 // cytokine receptor-like factor 3	CORD4
TAAGATGATA	21964 JAZF1	AW048853	O	vO	PrB	11 B5	NM_199196	17q11.2	NM_015355 // joined to JAZF1	CORD4
TTCAGGAAGG	27744 unc119 homolog (C. elegans)	BE950651	n	sscO	Pr(is)	11 B5	NM_011676 // UNC-119 homolog	17q11.2	NM_005148	CORD4
CCAGGAGAGG	229330 seizure related gene 6	AI846537	n	svO	sB	11 B5	NM_021286	17q11.2	NM_178860	CORD4
TAATCCGTAC	260539 Psmd11 proteasome (prosome, macropain) 26S subunit, non-ATPase, 11	BE949498	I	I(o)	AG	11 B5	NM_178616 // proteasome 26S non-ATPase subunit 11	17q12	NM_002815	CORD4
TGATGTTAAC	1411 fring/contains RING finger and IAP domains	AI020489	?	O	Pr	11 B5	NM_026097	17q21.1	NM_057178	CORD4
GGCAGGAGGG	9001 Nemo-like kinase	AI844692	O	O	PrIn	11 B5	NM_008702	17q11.2	NM_016231	CORD4
TAATAAGCAC	3759 Mnt max binding protein	AI844466	I	vO(o)	n	11 B-C	NM_010813	17p13.3	NM_020310	CACD
TCCGCTTGGT	4605 T-box 2	BE952335	sscO	vO	I	11 C	NM_009324 // T-box 2	17q23	NM_005994 // T-box 2	CORD4
ACCCGGCTAG	2214 septin 4	BE950445	sscO	svO	H	11 C	NM_011129	17q22-q23	NM_004574	CORD4/RP17
CAGGGTCTGG	66275 ESTs, Weakly similar to RAS-LIKE PROTEIN RRP22 [H.sapiens]	AI845411	sO	vO	M	11 C	XM_205779	17q21.1	BC041133	CORD4
TAGCCAAAAA	137 Chemokine (C-C motif) ligand 6	BC002073	O	scI(o)	I(pr)	11 C	NM_009139	Unk	NULL
CAAGCTTTGT	34490 2610318I15Rik RIKEN cDNA 2610318I15 gene	AI846097	O	scI(o)	PrI	11 C	NM_028259	17q23.2	NM_003161	CORD4
CAATGTGCTG	90390 myotubularin-related protein 4/novel FYVE Zn finger phosphatase	AW495463	O	O	Pr	11 C	NM_133215	17q22-q23	NM_004687	CORD4/RP17
TCTTTGTGGG	189782 Monocyte to macrophage differentiation-associated	AW411835	?	O	Pr	11 C	NM_026178	17q	NM_012329	CORD4
CGCTCCAGCC	5027 Enhancer of zeste homolog 1	BE948977	scI(O)	scI(o)	I(pr)	11 C-D	NM_007970	17q21.1-q21.3	NM_001991	CORD4
ATTCTCCAGT	140380 Mus musculus ribosomal protein L23 (Rpl23) mRNA, complete cds	AI851588	sO(o)	vO(p)	P	11 D	NM_022891	17q	NM_000978	CORD4
TCTGAGTGGT	28892 ESTs, Weakly similar to RSP-1 PROTEIN [Mus musculus]	AI843295	sI(o)	vO	I	11 D	NM_133807	17q21.33	NM_018509	CORD4
GCTGCTGGTG	254969 ESTs, Weakly similar to contains transmembrane [M.musculus]	AI852949	O	O	P	11 D	AK090368	17q21.31	XM_046017	CORD4
CCAGTCTGTG	251013 importin beta	BE981374	O	O	PrI	11 D	NM_008379	17q21.32	NM_002265	CORD4
GTCCACACTC	36242 membrane protein, palmitoylated 2 (MAGUK p55 subfamily member 2)	AW120547	O	O	I(pr)	11 D	NM_016695	17q12-q21	NM_005374	CORD4
ATCTCTGCAA	28297 ESTs, Highly similar to AF177476_1 CDK5 activator-binding protein [R.norvegicus]	BE627949	O	O	?	11 D	NM_030248	17q21.32	NM_025197	CORD4
AGGGAGAGGA	628 transcription factor like 4	AW489852	n	n	PrI	11 D	NM_011550	17q21.1	NM_170607	CORD4
AAGCAGACTA	42927 LIM motif-containing protein kinase 2	AI851330	I	I(o)	P	11 D	NM_010718	22q12.2	NM_005569
AATGGGGAGT	7268 thyroid hormone receptor-associated protein 100 kDa	AI854510	?	P	PrI	11 D	NM_011869	17q21.2	NM_014815	CORD4
GATGTGAAAA	29067 Mbtd1 mbt domain containing 1	AI850675	?	O	n	11 D	NM_134012	17q21.33	NM_017643	CORD4
GCGAGACCAC	36416 frizzled homolog 2/10 (Drosophila)	AF363723	sO	vO	sA	11 E1	NM_020510 // frizzled homolog 2	17q21.1	NM_001466 // frizzled 2	CORD4
AGGCGGAACG	22109 ESTs, Weakly similar to CG17593 gene product [D.melanogaster]	BE948449	sO	vO	I(o)	11 E1	NM_026009	17q24.2	NM_020198	CORD4
TAGGTAAAAC	41370 ESTs	AI846872	P	vO(p)	I(pr)	11 E1	NM_028710	17q24.2	NM_014960
TAAGCACAGG	139144 ESTs	AA138713	O	O	n	11 E1	NM_025275	17q24.2	BC050709	CORD4
ATTGGTGTCC	54993 2610205J15Rik RIKEN cDNA 2610205J15 gene	BF168813	O	O	Pr	11 E1	NM_152813	17q21.31	NM_133373	CORD4
CCTTGGCCTC	259113 novel RhoGAP?	BE686153	O	O	I(pr)	11 E1	NM_183288	17q21.31	NM_174919	CORD4
GCGGTCAGCA	871 radical fringe gene homolog, (Drosophila)	AI853309	sO(o)	scI(o)-vO(o)	M	11 E2	NM_009053	17q25	---	CORD4
ACGCGGGTCG	38347 BTB/POZ domain containing protein	AI836077	sO(o)	vO	M	11 E2	XM_126644	17q25.2	XM_085566	CORD4
ACATTGAAAA	21921 Borg4 protein/binder of Rho GTPase 4	AI844806	sO	scI+svO	H	11 E2	NM_020006	17q24-q25	NM_012121	CORD4
TTCGCCCTCC	41871 ESTs	AI843221	sO	O	PrI	11 E2	NM_053273	17q25.1	NM_032646	CORD4
TGGCCCTTGC	23168 ESTs	BF458726	P	scI(o)	I(pr)	11 E2	NM_028014	17q25.3	NM_014738	CORD4
TAGTTCCGAC	30195 LOC209318 Similar to G protein pathway suppressor 1	AA259836	P	vO	I(pr)	11 E2	NM_145370 // G protein pathway suppressor 1	17q25.3	NM_004127 // G protein pathway suppressor 1	CORD4
GCTTGTGGGC	34130 1700025G04Rik: RIKEN cDNA 1700025G04 gene	AW049571	O	scI(o)	A	11 E2	AK012601	ND	ND
none?	185355 poly IgR 3	AA472540	O	?	sB	11 E2	XM_137898	17q25.2	NM_174892	CORD4
GCCTCTGATA	148616 0610034P02Rik RIKEN cDNA 0610034P02 gene	BE291765	O	O	Pr	11 E2	XM_203352	17q25.3	XM_208944	CORD4
TCCTTGCAAA	39200 phosphodiesterase 6G, cGMP-specific, rod, gamma	AI847181	n	n	Pr	11 E2	NM_012065 // phosphodiesterase 6G, cGMP-specific, rod, gamma	17q25	NM_002602 // phosphodiesterase 6G, cGMP-specific, rod, gamma	CORD4
TGTGTAGTGC	14547 Chromobox homolog 2	AW048932	?	I(o)	I(pr)	11 E2	NM_007623	17q25.3	XM_300674	CORD4
GGAGTAAGAA	18516 H3 histone, family 3B	AI841334	?	vO(o)	Pr(is)A	11 E2	NM_008211	17q25	NM_005324	CORD4
CACCCGCAGC	7919 HGF-regulated tyrosine kinase substrate	AI844038	?	svO-OsvI	Pr(is)	11 E2	NM_008244	17q25	NM_004712	CORD4
CTCGAGCCTA	24594 Slc25a19 solute carrier family 25 (mitochondrial deoxynucleotide carrier), member 19	AI852122	?	?	PrB	11 E2	NM_026071	17q25.3	NM_021734	CORD4
TGTGTGCGTG	276240 ESTs/similar to D. unkempt zinc finger protein	AI853158	?	O	Pr	11 E2	NM_172569	17q25.3	XM_036115	CORD4
GGTAAGTGTG	8552 baculoIral IAP repeat-containing 5	BF465008	O	vO	M	11 E2	NM_009689	17q25	NM_001168	CORD4
GCGGCGCCGC	141066 activin receptor-interacting protein 2	BE852933	O	O	PrI	12	NM_025292	14q24.1	NM_018373	ACHM/MCDR4
GAGAAAGGAG	174155 cyclin K?	AI849607	O	scI(o)	n	12	XM_194862	14q32	XM_085179	ACHM1/MCDR4/USH1A
CCCAGGCTGT	20937 hippocalcin-like 1	BG093545	I(o)	vI(o)	A(pr)	12	XM_127938	5p15.1	NM_033414	MCDR3
TATCTGAAAT	235550 estrogen related receptor beta 2	AA589656	n	scO	Pr	12 21.31	NM_011934	14q24.3	NM_004452 // estrogen-related receptor beta	ACHM1/MCDR4/LCA3
GTGAGTGTTT	40715 ESTs	BE995838	I(sO)	vO	PrB	12 A1	NM_009234	2p25	NM_003108
TACATATCTG	208320 similar to rad18	AI838562	P	O	n	12 A2	NM_025695 // SMC6 protein /// NM_026052 //	2p24.3	NM_024624 // SMC6 protein
TTACTTACCA	87639 HBP1/HMG1	AW048699	O	O	?	12 A2	NM_153198	7q22.3	NM_012257
CAGAGTTATA	2028 Nuclear receptor coactivator 1	AI841750	?	O	P	12 A2-A3	NM_010881	2p23	NM_003743
TTTATGAAAA	16469 neuroblastoma myc-related oncogene 1	AI894031	I(o)	vO	M	12 A3-B	NM_008709	2p24.1	NM_005378
GGGAGCGAAA	34871 inhibitor of DNA binding 2	AW987145	O	vO	M	12 B	NM_010496 // inhibitor of DNA binding 2	2p25	NM_002166 // inhibitor of DNA binding 2, dominant negative helix-loop-helix protein
TGAGCCCCTG	22314 ATP-binding cassette, sub-family A (ABC1), member 3	AA717342	O	O	PrI	12 B3	NM_029545 // RIKEN cDNA 4930578F06	14q12	NM_080664	MCDR4/ACHM1
none?	121753 mirror image polydactyly protein	AI453948	O	O	Pr	12 C1	AK006974	14q13.3	NM_138731	MCDR4/ACHM1
ATAGGTTTCT	57138 Six6 Sine oculis-related homeobox 6 homolog	BE982408	sO(o)	scI(o)	?	12 C2	NM_011384 // sine oculis-related homeobox 6 homolog	14q23.1	NM_007374 // sine oculis homeobox homolog 6	MCDR4/ACHM1
TTGACTTTAT	29075 reticulon 1	AW763893	I	vI	sG	12 C2	NM_153457	14q21-q22	NM_021136	MCDR4/ACHM1
CTTTGTTAGT	3879 hypoxia inducible factor 1, alpha subunit	BE955791	scI(o)	scI(o)	Pr(is)B	12 C3	NM_010431	14q23.2	NM_001530	MCDR4/ACHM1
TTGAGGGGTT	28526 ESTs /KIAA0321 FYVE Zn fingers+weak similarity to hrs-2	AA967609	?	O	PrI	12 C3	XM_127031	14q24.1	NM_015346	ACHM1/MCDR4/LCA3
CAAAGACTGC	4405 Chx10 C. elegans ceh-10 homeo domain containing homolog	BF461223	sO	vO	B	12 D1	NM_007701	14q24.3	NM_182894	ACHM1/MCDR4/LCA3
AAATAAAAAT	125287 ESTs, Moderately similar to unknown [H.sapiens]	BE987785	I(o)	vO(sci)	PrI	12 D2	NM_134044	14q24.3	NM_022067	ACHM1/MCDR4/LCA3
TGGAAATCAA	40282 Gphn gephyrin	BF460559	I(o)	I(o)	AG	12 D2	NM_172952 // gephyrin	14q23.3	NM_020806 // gephyrin	MCDR4/ACHM1
CTGTCAGTGG	33840 ESTs/KIAA1036 weak similarity to 5'exonucleotidase	AI834978	I(o)	O	P	12 D2	XM_196074	ND	ND
TAGATTTCCC	121647 retinol dehydrogenase 12	AA821382	?	O	Pr	12 D2	XM_126957	14q24.1	NM_152443	ACHM1/MCDR4/LCA3
GTGCAAGGAG	21389 type II deiodinase	AI852512	P	O	PrI	12 D3	NM_010050	14q31.1	NM_000793	MCDR4/ACHM1
GGGCACAACT	4137 chromogranin A	AI839579	O	O	I	12 E	NM_007693 // chromogranin A	14q32.12	NM_001275 // chromogranin A	ACHM1/MCDR4/USH1A
TGGCCAGTAA	23357 ESTs, Moderately similar to AF094609_1 fertility related protein WMP1 [R.norvegicus]	BE369401	O	O	Pr	12 E	NM_178914	14q31.3	NM_018418	MCDR4/ACHM1
CAAATGATAA	205578 ESTs, Weakly similar to unknown [D.melanogaster]	AI851515	O	O	I	12 E	XM_127105	14q32.12	XM_085175	ACHM1/MCDR4/USH1A
AATAAACATC	87077 protein disulfide isomerase related protein	BE456289	?	?	Pr	12 E	NM_176997	14q32.12	NM_017936	ACHM1/MCDR4/USH1A
GTGCTTTCAA	200506 MEG-3	AI852838	scI(sO)	vI(p)	sAG	12 F1	NM_144513	14q32	XR_000058	ACHM1/MCDR4/USH1A
CATTTTGTTT	233524 RIKEN full-length enriched library, clone:B930036G03 product:unknown EST, full insert sequence	AW048956	P	O	PrI	12 F1	AK047211	14q32.32	NM_022747	ACHM1/MCDR4/USH1A
CTTGACACAC	260384 translation initiation factor eIF-5	AI851200	I(sO)	vO(o)	I(pr)	12 F1	NM_173363 // eukaryotic translation initiation factor 5	14q32.33	NM_001969 // eukaryotic translation initiation factor 5	ACHM1/MCDR4/USH1A
TATTAGTCTT	1843 heat shock 90kD protein 1, alpha	AI839932	?	vO(o)	Pr(is)	12 F1	NM_010480	14q32.33	NM_005348	ACHM1/MCDR4/USH1A
CAGCATACAG	41287 Eml1 echinoderm microtubule associated protein like 1	AI044845	?	O	P	12 F1	XM_127139	14q32	NM_004434	ACHM1/MCDR4/USH1A
GAAAGGCCAC	2144 Ena-vasodilator stimulated phosphoprotein	BE687576	O	scI(o)	P	12 F2	NM_007965	14q32.2	NM_016337	ACHM1/MCDR4/USH1A
AAATTAGTAT	30864 ESTs, Weakly similar to KRAB-zinc finger protein KZF-1 [R.norvegicus]	AI838681	O	vO	I(pr)	12 F2	NM_019565	ND	ND
TTATATGTGG	4463 Vasoactive intestinal peptide receptor 2	AI894015	I	vI(p)	PrI	12 F2	NM_009511	7q36.3	NM_003382
TCAACATCTA	3785 Protein phosphatase 2, regulatory subunit B (B56), gamma isoform	AI893929	I	vO	A	12 F2	NM_012023	14q32.31	NM_002719	ACHM1/MCDR4/USH1A
TGACCAGCTG	41911 cytochrome P450, 46 (cholesterol 24-hydroxylase)	AW050369	?	O	PrI	12 F2	NM_010010	14q32.1	NM_006668	ACHM1/MCDR4/USH1A
CCTGTGGTTT	28678 MAP/microtubule affinity-regulating kinase 3	BE457757	?	O	P	12 F2	NM_021516	14q32.3	NM_002376	ACHM1/MCDR4/USH1A
CATAGTTTAA	142195 RANBP 9	AI842775	O	vO	I(pr)	13 13-A5	NM_023554	6p23	NM_016167 // retinoic acid repressible protein
GAGGCTGTGG	141365 Aldo-keto reductase family 1, member E1	BF461282	P	P	P	13 A1	NM_018859	10p15.2	NM_031436
GAATTCCACT	29962 Mus musculus SCAN-KRAB-zinc finger protein (Skz1) mRNA, complete cds	AI852535	O	vO	n	13 A3.1	NM_023685	6p21.33	NM_024493 // zinc finger protein 306
GTGGGATGGA	187444 ESTs, Weakly similar to ZFP2_MOUSE Zinc finger protein 2 (Zfp-2) (mKR2 protein) [M.musulus]	AI482353	O	O	Pr	13 A3.1	NM_183014	6p21.3	NM_007149
TACCGGGAAG	214548 Bone morphogenetic protein 6	AI850533	P	vO(o)	PrI	13 A3-A5	NM_007556	6p24-p23	NM_001718
GGGACCTCGT	18789 SRY-box containing gene 4	AW124153	I	scI(scO)	sB	13 A3-A5	NM_009238	6p22.3	NM_003107
GACTCTGAAT	8149 male germ-cell associated kinase	AW495430	sscO	scO	Pr	13 A4	NM_008547	6q22	NM_005906
GTATTTAAAT	160124 Rpel1 RPEL repeat containing 1	AI849507	sO	O	PrI	13 A4	NM_198419	6p23	XM_166420
GATTGTGAAG	25018 C9orf10a	BF467012	sO	vO	PrIn	13 A5	BC010304	9q22.2	NM_014612 // C9orf10 protein
GGCCAGGGCA	34308 1700017I11Rik RIKEN cDNA 1700017I11 gene	AI837275	n	O	Pr	13 A5	NM_025491	9q22.32	NM_145006
ACTTTTTGAC	275981 2810012K13Rik RIKEN cDNA 2810012K13 gene	AI837465	?	O	Pr	13 A5	XM_127336	9q22.2	NM_024077
TAGCACTTGG	20350 Mad3 Max dimerization protein 3	AI426051	O	svO(p)	A(p)	13 B1	NM_016662	5q35.3	NM_031300 // MAX dimerization protein 3
CTTCTATTTG	29353 mannan-binding lectin serine protease 1	AI847697	O	O	n	13 B1	NM_025933 // RIKEN cDNA 2010110M21	5q35.3	NM_138820 // hypothetical protein MGC2198
CAGAGAGAGA	36879 Cltb clathrin, light polypeptide (Lcb)	AI835599	O	O	PrI	13 B1	NM_028870	5q35	NM_001834
AATAAAGCCA	200843 beta synuclein	AI836590	n	I	AG	13 B1	NM_033610	5q35	NM_003085
CGGCAAAAAA	12964 nuclear receptor-binding SET-domain protein 1	AI843899	I(o)	scI(o)	?	13 B1	NM_008739	5q35.3	NM_022455
none	139825 protein beta1,4-galactosyltransferase, polypeptide 7	BE947878	I(o)	scI(o)	Pr(is)I	13 B1	NM_146045	5q35.2-q35.3	NM_007255
ATGACAAAGA	268902 complexin 2	AI835497	I	scO(I)	sAG	13 B1	BC058395	5q35.2	AK055043
AGGAGGAGTA	220923 RAB24, member RAS oncogene family	AI153131	I	vO	I(pr)	13 B1	NM_009000	5q35.3	NM_130781
GCCCCTGTGT	31516 zinc finger protein 72	AI503589	O	O(I)	PrI	13 B3	NM_133228	14q11	NM_016423	MCDR4/ACHM1
TTGATCTTCA	4683 Fanconi anemia, complementation group C	AI848852	n	O	PrI	13 B3	NM_007985	9q22.3	NM_000136
ACACGACGTA	50 BC005662 cDNA sequence BC005662	AI850414	scI(p)	vO	PrI	13 C1	NM_145376 // cDNA sequence BC005662	5p15.33	NM_024830 // hypothetical protein FLJ12443	MCDR3
TTAACTCTGT	23939 ESTs	AI851600	I	I(o)	PrI	13 C3	NM_172588	5q14.1	NM_178276	WGN1/USH2C
ACTGCTTTTT	1538 basic transcription factor 3	AI849189	sO	n	n	13 D1	NM_145455	5q13.1	NM_001207 // basic transcription factor 3	WGN1
TTTTCAGTGG	201455 ESTs	AI837049	O	O	PrI	13 D1	BC002185	5q13.3-q14.1	NM_004866	WGN1/USH2C
GTCGGTTGTA	259333 splicing factor 4	BF682784	O	O	I(pr)	13 D1	NM_183206	5q13.1	NM_181504	WGN1
TGTGACGCTG	75498 cocaine and amphetamine regulated transcript/neuropeptide	AI854310	I(o)	scI(o)	PrIA	13 D1	NM_013732	5q13.2	NM_004291	WGN1
GATAAAGAAA	246752 SoxLZ/Sox6 leucine zipper binding protein in testis	BF462743	I(o)	O(I)	I(pr)	13 D1	NM_021790	5p15.2-q12.3	NM_022145	MCDR3
GGAACAACCC	40241 CRF binding protein	AI854101	CM	CM	CM+sG	13 D1	Q60571	5q11.2-q13.3	NM_001882
GTGTGAGAAT	45357 Erbb2 interacting protein	AI843677	?	O	Pr	13 D1	NM_021563	5q13.1	NM_018695	WGN1
ACTTAGAATG	101360 KIAA0888	AI845850	?	O	Pr(is)I	13 D1	XM_286568	5q13.3	XM_032571	WGN1
TCAAGATTTT	2025 survival motor neuron	AI849087	vO	scI(o)	I(pr)	13 D1/D2.1	NM_011420	5q13	NM_000344	WGN1
TTTTTAATGT	89136 H3 histone, family 3A	AW260090	sO	scO+scI	Pr(is)B	13 D2.3	NM_008210	1q41	NM_002107
ACCAACAGGT	134516 Otx2	BE859432	sO(o)	vO	n	14	NM_144841	14q21-q22	NM_021728	MCDR4/ACHM1
AAATAAATAA	295706 TGFalpha	AW493721	O	O	Pr	14	NM_031199	2p13	NM_003236	RP28
TACATTGCAC	260881 Ca<2+>dependent activator protein for secretion	BE950560	scI	scI(o)	AG	14 A1	NM_012061	3p21.1	NM_003716
GTGTTAACCA	2050 60S ribosomal protein L15	BF460537	O	scI(o)	I	14 A1	NM_025586	3p24.2	NM_002948
ATGCAGTTCA	151135 4832404P21Rik RIKEN cDNA 4832404P21 gene	AI853865	O	O	PrI	14 A2	XM_127591	ND	ND
TGCTTGGAAA	284523 sal-like 3 (Drosophila)	AI854712	sscO	svO	H	14 A3	NM_026528	14q22.1	NM_016039	MCDR4/ACHM1
GCCCACATCC	150007 ESTs	AI842314	O	vO(o)	PrI	14 A3	AK010966	3p21.1	NM_022908
GTTTCATTTT	39513 ESTs/KCNMA1 calcium-activated potassium channel	AI835710	?	O	PrsB	14 A3	NM_175545	10q22.3	XM_084389
GGGCACCCTT	151562 Rbp3 retinol binding protein 3, interstitial	AI854618	ssO	ssO	Pr(is)	14 B	NM_015745	10q11.2	NM_002900
CTGTTAACCT	156506 Photoreceptor cadherin	AI852446	sscO	scO	Pr(is)	14 B	NM_130878	10q22.1-q22.3	NM_033100
ATGATGATGA	28876 D14Ertd226e DNA segment, Chr 14, ERATO Doi 226, expressed	AI848441	O	vO	n	14 B	NM_145928	12q22	NM_001731
GTGCTTGTAC	87312 Glia maturation factor, beta	BE861103	I(o)	O	B(pr)	14 B	NM_022023	14q22.2	NM_004124	MCDR4/ACHM1
TGGATGCATT	134302 ESTs	BG294098	?	scO(o)	Pr	14 B	NM_173418	10q23.2	XM_291697
GGCCAGAGCT	39487 sal-like 2 (Drosophila)	AI852027	O	vO	PrI	14 B-C1	NM_015772	14q11.1-q12	XM_300608	MCDR4/ACHM1
ACAAGGGACT	30236 Acinus apoptotic chromatin condensation inducer in the nucleus	AI839299	vO	I(o)	M	14 C1	NM_019567	14q11.2	NM_014977	MCDR4/ACHM1
GTTGCTCACA	2032 interferon dependent positive acting transcription factor 3 gamma	BF660863	O	O	Pr(is)I	14 C1	NM_008394	14q11.2	NM_006084	MCDR4/ACHM1
TCCCCAATAA	9239 ZFN-219	AI481669	O	O	I(pr)	14 C1	NM_027248	14q11	NM_016423	MCDR4/ACHM1
CCTGCTCTGG	20422 Nrl	BE982468	n	sscO(o)	Pr(is)	14 C1	NM_008736	14q11.1-q11.2	NM_006177	MCDR4/ACHM1
GCTGCATAGC	21662 Mus musculus RPGR-interacting protein mRNA, complete cds	AI851830	n	n	Pr(is)	14 C1	NM_023879	14q11	NM_020366	MCDR4/ACHM1
GGCAGACTGT	194050 ESTs/no obvious ORF	BF449937	sO	scO(scI)	PrI	14 C3	AK044422	8p23.1	XM_088347
GGTAGAACTG	22758 Ebrp-pending emopamil binding related protein, delta8-delta7 sterol isomerase related protein	AI852782	P	scO-scO(vO)	Pr	14 C3	NM_026598	13q12-q13	NM_032565
TGGGTCTGGA	138004 ESTs	BE983540	n	O	PrI	14 C3	NM_146246	8p23.1	XM_291248
TTTGCTGTGT	43871 Trim35 tripartite motif-containing 35	AI846067	sO(o)	O(sci)	A	14 D1	NM_029979	8p21.1	NM_015066
GTTTCAGTTC	218284 KIAA1967	AI430543	P	scI(vO)	A+Pr	14 D1	NM_146055	8p22	NM_021174	ROA1
TAACTTGTAG	29820 BCL2/adenoIrus E1B 19 kDa-interacting protein 3-like	AI452081	O	vO	M	14 D1	NM_009761	8p21	NM_004331
TTGTGGTGGA	41708 Leucine-rich repeat LGI family, member 3	AI840690	O	O	Pr(is)A	14 D1	NM_145219	8p21.3	NM_139278	ROA1
AGCAGTTTCT	33831 ESTs	BG148691	O	O	PrI	14 D1	NM_175384	8p21.2	AK098670	ROA1
TCTCCAGGCG	200608 clusterin	AI836624	n	n	M	14 D1	NM_013492	8p21-p12	NM_001831 // clusterin
GGGGACGCAT	34191 ESTs	AI846032	I-P-O	O(sci)	A	14 D1	NM_153136	8p21.3	NM_024815
TGTGGATGTC	36710 Mitochondrial solute carrier protein	AI463445	?	O	Pr(is)	14 D1	NM_026331	8p21.2	NM_016612	ROA1
CTCCTGCAGC	1017 esterase 10	AI839908	?	?	Pr	14 D2-E2	NM_016903	13q14.2	NM_001984
CTGTTTTTAT	68134 2310046K10Rik RIKEN cDNA 2310046K10 gene	AW494810	P	P	PrI	14 D3	NM_029495	13q13.3	NM_033255
GTAGCAAAAG	23876 ESTs, Highly similar to PROPIONYL-COA CARBOXYLASE ALPHA CHAIN PRECURSOR [Rattus norvegicus]	BE292669	?	O	PrI	14 E5	NM_144844	13q32	NM_000282
TCGCAGTAAT	35584 Skp2 S-phase kinase-associated protein 2 (p45)	BF466389	vO	O	n	15	NM_013787	5p13	NM_005983	MCDR3
GTTGTCTTCA	29145 zinc finger-like protein 9	BG403968	O	O	I	15 B1	NM_144523	5p15.1	NM_033414	MCDR3
GTATACAATT	102171 ESTs	AW493111	P	O	PrI	15 B2	NM_026153	5p15.31	XM_293937	MCDR3
TCTCTGAATG	197518 lysosomal-associated protein transmembrane 4B	AI844804	n	scI(o)	Pr(is)I	15 B3.1	NM_033521	8q22.1	NM_018407
GCACGACCTG	135621 neurocalcin delta	AI836220	?	?	I	15 B3.1	NM_134094	8q22-q23	NM_032041
TTTCTGGAGA	41776 otoconin 90/phospholipase A2-like	AI894211	O	O	PrI	15 D1	XM_128141	8q24	Z14310
none	102395 KCNQ3	AW494964	?	P	PrI	15 D1	NM_152923	8q24	NM_004519
AGAGACAAGG	4063 N-myc downstream regulated 1	AI852317	?	sO(o)	H(pri)	15 D2	NM_010884	8q24.3	NM_006096
GCCTTTTGCC	265946 Vps28	AI851335	sO	vO	n	15 D3	NM_183091	8q24.3	NM_013432
TTGGTTTCAA	24301 ESTs	BE949379	O	O	PrI	15 D3	AK010095	8q24.3	XM_291257
GTGCTGTGAG	87210 ZINC FINGER PROTEIN ZFP-92	BF459062	O	O	Pr	15 D3	NM_011759	8q24.3	NM_173832
CACTGAGTGT	201653 ESTs	AI841771	O	O	M(pr)	15 D3	NM_026859	8q24.3	NM_032272
GGCGGGGCCC	234912 ESTs, Weakly similar to 230k bullous pemphigoid antigen BPM1 [M.musculus]	AI844893	O	vO	M	15 D3	XM_128242	8q24	NM_000445
TTGACTCTTA	29674 focal adhesion kinase	AA153019	n	vO	P	15 D3	NM_007982	8q24-qter	NM_005607
CAGCTGAAGC	27033 hypertension-related calcium-regulated gene	AI847650	?	O	Pr	15 D3	NM_025536	8q24.3	NM_014066
ACAATAAACA	41554 ESTs, Weakly similar to OZF_MOUSE ZINC FINGER PROTEIN OZF [M.musculus]	AI847036	?	O	I	15 D3	NM_030199	8q24.3	NM_015117
TAGCTCAGGC	153891 protein phosphatase 4a3	BG276478	O	O	PrI	15 E1	NM_008975	8q24.3	NM_007079
GGCCACAGGG	23758 ESTs, Moderately similar to dJ222E13.3 [H.sapiens]	AI846471	O	O	B(pr)	15 E1	NM_178627	22q13.31	NM_032311
AAGGAACTCA	100163 insulin-like 5	BG962107	I(vo)	scI(o)	A(pri)	15 E1	NM_011831	1p31.2	NM_005478
AAGGAACTCA	274860 ESTs, Highly similar to DNA-DIRECTED RNA POLYMERASE II 14.4 KD POLYPEPTIDE	AI835726	I(o)	vI(p)	AG(p)	15 E1	AK007913	22q13.1	NM_021974
TGCTGGACGT	38016 Sterol regulatory element binding factor 2	AI846395	I	scI(o)	sA	15 E1	XM_127995	22q13	NM_004599
GGCGAGGAAG	57052 Rhpn1 rhophilin, Rho GTPase binding protein 1	AW210837	?	?	Pr	15 E1	NM_008164	8q24.3	NM_052924
GCGGCAGGCG	24442 ESTs	AI846781	O	vO	M	15 E2	NM_172611	22q13.31	XM_027105
GGCGCTCACC	22913 ESTs	AI841228	I(sO)	vO+I	AG	15 E2	AK007745	22q13.31	AB051431
TCTTCTGTGG	38233 protein tyrosine kinase 9	BE851773	P	P	P	15 F1	NM_008971	12q12	NM_002822
ATGAACACTG	117008 ZNF262	BF022967	O	O	PrI	15 F1	NM_011653	2q36.1	NM_006000
TATCTGGAAT	27141 Rac GTPase-activating protein 1	BF099342	O	O	PrI	15 F1	NM_012025	12q13.12	NM_013277
GACCAAAATT	7308 SMARCD1 SWI/SNF related, matrix associated, actin dependent regulator of chromatin, subfamily d, member 1	AI851580	O	scI(o)	A	15 F1	NM_031842	12q13.12	NM_003076
TAATATGTAG	27269 similar to Xenopus maternal transcript 4G2	AI839775	O	vO	PrI	15 F1	NM_133714	12q13.11	NM_017822
AAGCACTGGT	201624 ESTs	AI593524	?	P	P	15 F1	NM_134093	12q13.13	NM_015416
ATGTCTCAAA	231463 tubulin alpha 2	AI839893	sG	sG	sG	15 F1	NM_011654	12q13.12	NM_006082
AAATCTCCAA	152952 contains multiple ankryin repeats	BE985995	?	scO(o)	Pr(is)	15 F2	NM_144790	12q13.13	NM_182608
CACTCTTCTA	33583 single-strand selective uracil gycosylase (SMUG1)	AW050366	O	O	PrB	15 F3	NM_027885	12q13.11-q13.3	NM_014311
GACTCTTTCT	14099 hematopoetic zinc finger	AI427231	?	O(sci)	Pr(is)A	15 F3	NM_013866	12q13.13	NM_015481
AATTGGTTCA	5458 Chaf1b chromatin assembly factor 1, subunit B (p60)	BF467531	sO	svO	n	16 A1	NM_028083	21q22.13	NM_005441.1
GGTGGAACGG	24950 Not56-like	AI846632	scI(p)	vO(p)	PrI	16 A1	NM_145939	3q27.3	NM_005787
CCCCAGGACT	234165 mPar3	BE988459	P	P	I	16 A1	NM_183287	22q11.22	XM_301898
ACTTTGATAT	21119 LPS-induced TNF-alpha facto	AI852632	O	vO	?	16 A1	NM_019980	16p13.13	NM_004862
CAGGTGCCAT	29333 2700067D09Rik RIKEN cDNA 2700067D09 gene	AI850550	O	O	PrI	16 A1	NM_028301	16p13.3	XM_058800
ATTTTGTGCA	21652 novel dehydrogenase?	AI854082	O	vO	M	16 A1	NM_028720	16p13.3	NM_032569
GGAGAGGAAG	28087 Gli5	AI844650	O	O	sB	16 A1	NM_031184	16p13.3	NM_032575
TTGTGTGTGT	156736 ESTs/KCNE2 minK-type K-channel MiRP1	AW048273	O	O	sPr	16 A1	NM_134110	21q22.12	NM_172201
TCTTTCAAAA	156517 interphotoreceptor matrix proteoglycan 200/SPARCAN	BF466830	O	vO	PrI	16 A1	NM_174876	3q12.2-q12.3	NM_016247
GCAGAAAGCA	103742 Cdc42 GTPase-activating protein	AW048908	n	sscO	Pr	16 A1	NM_020260	3q13.33	XM_291085
GAAATAAATG	196581 mitogen activated protein kinase 1	AA217261	I(o)	I(o)	P	16 A1	NM_011949	22q11.21	NM_002745
CCTCTTCCCC	214519 ESTs/proline-rich protein	AI844519	I(o)	O	P	16 A1	XM_148705	16p13.3	NM_145253
CTCCGTTTTG	29976 septin 5	AA967970	I	I(o)	A	16 A1	NM_010327	22q11.21	NM_002688
TAAGAAACCT	20832 Robo1	AI836415	CM	sscI	n	16 A1	NM_019413	3p12	NM_002941	BBS3
GGGAGCGGGC	147697 proteasome 26S subunit	AI414985	?	O	I+G	16 A3	NM_134101	3q27.3	NM_002808
TAAAAAATAA	71 protein kinase, DNA activated, catalytic polypeptide	AI386256	O	vO	I+G	16 B1	NM_011159	8q11	NM_006904
TAATAAATAA	218423 2010110K24Rik RIKEN cDNA 2010110K24 gene	AI850172	P	vO	A	17	NM_025934	5q15	NM_018343	WGN1/USH2C
CCCTGGGTTC	7500 ferretin light chain	AI850187	I(sO)	svI(icmo)	?	17 A1	NM_010240	19q13.3-q13.4	NM_000146
ACTTCAGCCA	1948 t-complex testis expressed 1	AW123690	I(o)	I(o)	PrI	17 A1	NM_009342	6q25.2-q25.3	NM_006519	RCD1
TCTACACATA	2576 brain protein 44-like protein	AI853815	?	I(scO)	A	17 A1	NM_018819	6q27	NM_016098
TGATCATACT	43711 TATA box binding protein	AI848796	P	P	I	17 A2	NM_013684	6q27	NM_003194
TTCATTCTTA	4438 high mobility group AT-hook 1	AI836908	sO	vO	n	17 A3.3	NM_016660	6p21	NM_002131
TGAGATGGCA	41925 ESTs, Moderately similar to c380A1.2.1 [H.sapiens]	AI848066	P	O	PrI	17 A3.3	XM_128551	16p13.3	NM_024042
CGTTTACTGG	44095 2900074C18Rik RIKEN cDNA 2900074C18 gene	BF454802	O	O	PrI	17 A3.3	NM_013630	16p13.3	NM_000296
GCGGGTGGGG	270791 polycystic kidney disease 1 homolog	AI852157	O	O	PrI	17 A3.3	NM_013630	16p13.3	NM_000296
AGAGTCAGCG	22602 ATPase, H+ transporting lysosomal (vacuolar proton pump), 9.2 kDa	AI848935	O	vO	PrI	17 A3.3	NM_025272	5q35.2	NM_003945
GTGGTTGAAA	196081 Ppil1 peptidylprolyl isomerase (cyclophilin)-like 1	AW122135	O	O	PrB	17 A3.3	NM_026845	6p21.1	NM_016059
TGCAACCACC	34546 DNA segment, Chr 17, ERATO Doi 441, expressed/HN1 (Hematological and Neurological expressed sequence 1)	BE943721	O	I(o)	PrI	17 A3.3	XM_128602	16p13.3	NM_144570
TGGCAGCATA	182193 membrane-associated tyrosine-and threonine-specific cdc2-inhibitory kinase (	AA756143	I(o)	P	?	17 A3.3	NM_023058	16p13.3	NM_004203
GTTGAGGTTT	19077 Arht2 ras homolog gene family, member T2	AI550313	?	O	Pr	17 A3.3	NM_145999	16p13.3	NM_138769
CCCCCCGTCA	201859 thymic dendritic cell derived factor	BF147540	?	O	Pr	17 A3.3	XM_283409	6p21-p22	NM_021922
CAATGACTTG	23684 axin	AW061082	O	vO	M	17 A3.3	XM_128515	16p13.3	NM_003502
GCAGGCACTC	1703 Tubulin, beta 5	AW491568	sO+I	vI	n	17 B1	NM_011655	6p21.31	NM_001069
AAGTAAGTCT	14097 TAP binding protein	AI836367	P	P	P	17 B1	NM_009318	6p21.3	NM_003190
CACGACACCC	21362 zinc finger protein 57	BE952808	P	I(o)	PrI	17 B1	NM_009559	6p21.32	XM_294093
GGGAACCCCT	7103 Pre B-cell leukemia transcription factor 2	AA839392	O	vO	I	17 B1	NM_017463	6p21.3	NM_002586
CAAGGAAACT	27782 Robo4	BE986734	O	O	n	17 B1	NM_028783	11q24.2	NM_019055
AGGAGCCCTG	29385 protein phosphatase 1, regulatory subunit 10	AW488180	O	vO(o)	PrI	17 B1	NM_175934	6p21.33	NM_002714.2
GCCAAAGCTT	82354 ESTs, Weakly similar to F57H12.	AW061095	I	scI(o)	I(pr)	17 B1	NM_028476	6p21.32	NM_024909
TCTACAAGAA	2180 heat shock protein, 84 kDa 1	AI838924	sO	vO	Pr(is)AG	17 B3	NM_008302	6p12	NM_007355
GGAGAGGGGA	187301 ESTs	AW120822	O	O	PrI	17 B3	XM_128683	6p21.1	NM_015089
CAGTTCCCCT	21470 ESTs/similar to UDP-galactose transporter-related protein	AI842275	I	vO	PrI	17 B3	XM_128634	17q21.33	NM_005827	CORD4
GGGAGGGAAG	3444 bromodomain-containing 2	AI839729	P	vO(p)	PrI	17 C	NM_010238	6p21.3	NM_005104
CTGCAGCTAG	5021 Discoidin domain receptor family, member 1	AI430426	O	vO	M	17 C	NM_007584	6p21.3	NM_001954
CTGCCTTAAT	104769 Ccnd3 cyclin D3	AI841379	O	vO	M	17 C	NM_007632	6p21	NM_001760
AAATGGCTAT	38268 hepatoma-derived growth factor, related protein 2	BC003741	O	vO(o)	M	17 C	NM_008233	19p13.3	NM_032631
GACAGATGGA	32191 gamma-aminobutyric acid (GABA) B receptor, 1	BE952051	O	O	PrB	17 C	NM_019439	4p15.33	NM_153686	STGD4/MCDR2
GGCGTCGTCA	5032 Rds retinal degeneration, slow (retinitis pigmentosa 7)	BE950297	n	n	Pr(is)	17 C	NM_008938	6p21.2-12.3	NM_000322
ATGCTGGAGG	4381 special AT-rich sequence binding protein 1	AW491135	n	n	PrI	17 C	NM_009122	3p23	NM_002971
CACCCAATAT	59151 Guca1b guanylate cyclase activator 1B	BM942641	n	?	Pr	17 C	NM_146079	6p21.1	NM_002098
GTTTTTGCCC	1243 Retinoid X receptor beta	AI851061	I(o)	O(sci)	P	17 C	NM_011306	6p21.3	NM_021976
AGCAGCTTGC	253518 Bromodomain-containing 4	AI838366	I(o)	vO	PrI	17 C	NM_020508	19p13.1	NM_014299
GAGGACCTGG	258771 Ptprs protein tyrosine phosphatase, receptor type, S	AI118860	P	vO	M	17 D	NM_011218	19p13.3	NM_002850
GAAGGTGTGC	16224 guanylate cyclase activator 1a (retina)	BE954739	n	n	Pr(is)	17 D	NM_008189	6p21.1	NM_000409
GGCTCCCTGC	38036 ESTs, Highly similar to neurexin II [M.musculus]	AI849168	Bv(o)	Bv(o)	Bv(p)	17 D	NM_017393	19p13.3	NM_006012
ACCGACAACT	10153 Mus musculus mRNA for twisted gastrulation protein (tsg gene)	AW060819	sO	sO	PrB	17 E1.1	NM_023053	18p11.3	NM_020648
CTAAGGTTTA	158103 lipin 2 (nuclear protein)	AI843802	O	O-scI	Pr(is)B	17 E1.3	NM_022882 // lipin 2	18p11.31	NM_014646 // lipin 2
AATCAAAAAG	41891 ESTs, Weakly similar to T08D2.6 [C.elegans]	BF456660	vO	O	PrI	17 E2	NM_026417	2p23.1	NM_032312
TGCATTGCTG	275714 ESTs, Highly similar to AF151885_1 CGI-127 protein [H.sapiens]	AI836887	O	O	PrB	17 E2	BC025125	2p23.3	NM_016061.1
GCAGAAAATT	167266 ESTs/novel MAP	BE944071	vO	O	M(pr)	17 E4	XM_128772	2p22-p21	NM_019063
GGGAAGATTT	150838 ESTs/15kb 5' of Six3	AW209946	O	vO(o)	I	17 E4	AK044330	2p21	ND
TGGAAGCAAG	150838 ESTs	BF461098	O	vO	n	17 E4	NM_175267	10q22.3	NM_144589
TGGCTCGAGG	262525 sine oculis-related homeobox 3 homolog (Drosophila)	BE953775	I(o)	vO	n	17 E4	NM_017393	2p21	NM_005413
GGGCCCAACT	21149 Mus musculus CRIPT protein mRNA, complete cds	AI838759	I(o)	scO(o)	Pr(is)B	17 E4	NM_019936	2p21	NM_014171
TCCAATAAAG	153618 Zinc finger protein 191	BE943997	vO	vO	n	18	NM_021559	18q12	NM_006965	OPA4
GCAGGGAGGA	192285 complexin IV	BI733911	n	n	Pr(is)	18	NM_145493	18q21.32	XM_292705	CORD1
TTGACAAACT	20828 enhancer of polycomb homolog 1, (Drosophila)	AI849475	P	O(p)	A	18 A1	NM_007935	10p11	NM_025209
GTAGGATAGC	101780 similar to cleavage and polyadenylation specific factor 6	BE986835	vO	vO	Pr(is)Bv	18 A2	NM_153058	18q12.1	NM_014268	OPA4
AATTCGCGGA	2108 Transthyretin	AI847846	R	R	R	18 A2	NM_013697	18q12.1	NM_000371	OPA4
CTGTCAAAGA	25298 signal transducer and activator of transcription 3 interacting protein 1	AI849238	O	vO(o)	Pr	18 A2	NM_021448	18q12.2	NM_018255	OPA4
AATTTTTAAA	100923 Dtna dystrobrevin alpha	AI427407	I	O	AG	18 A2	NM_010087	18q12	NM_001390	OPA4
CGGGCATCGG	4383 Bin1 Myc box dependent interacting protein 1	AI848746	sO(o)	I(o)	PrA	18 B1	NM_009668	2q14	NM_004305
TGCATCCTGT	7883 adenomatosis polyposis coli	AI852678	O	O	PrI	18 B1	NM_007462	5q21-q22	NM_000038	WGN1/USH2C
TTCTTATTAA	256368 5830462I21Rik RIKEN cDNA 5830462I21 gene	BE852251	O	O	PrI	18 B1	NM_029518	5q31	NM_016604
CACTGTCCCT	4919 D0H4S114 DNA segment, human D4S114	AI849124	I	vO	I	18 B1	NM_053078	5q22.1	NM_004772 // neuronal protein 3.1	WGN1/USH2C
GTGTGTGGGT	8180 Dpysl3 dihydropyrimidinase-like 3	BF453976	sI(o)	I(sco)	Pr	18 B3	NM_009468	5q32	NM_001387
TCCCTGTAGT	102496 Nedd4 WW binding protein 5	AI843764	I	P	P	18 B3	XM_128893	5q31.3	NM_030571
GGATATGTGG	181959 Early growth response 1 (was nemo-like kinase)	AI849001	?	O	PrI	18 C/D	NM_007913	5q31.1	NM_001964
CTTACATTTC	4846 lamin B1	BE949909	vO	O	PrI	18 D3	NM_010721	5q23.3-q31.1	NM_005573 // lamin B1
GTGTCCGGTT	43737 Casein kinase 1, alpha 1	AI847674	?	?	Pr	18 D3	NM_146087	5q32	NM_001892
AAGCTGCAGG	3499 Rax Retina and anterior neural fold homeobox	AF001906	sO(o)	vO	n	18 E1	NM_013833	18q21.31	NM_013435	CORD1
GACTTGGACT	173826 dymeclin	AI838217	?	O	Pr	18 E2	NM_027727	18q12-q21.1	NM_017653	OPA4
GCCCGGGAAT	276337 ribosomal protein L17	AI838730	P	P	P	18 E3	XM_284068	6q21	NM_022361
CACGCCTTGT	26594 ESTs, Weakly similar to actiIty-dependent neuroprotective protein [M.musculus]	BF158746	O	O	PrI	18 E3	BC024969	18q23	NM_014913
ACCAAGGCAA	153412 nuclear factor of activated T-cells, cytoplasmic 1	BE634705	?	O	PrI	18 E4	NM_016791	18q23	NM_006162
GGTTTATTTT	22980 Rcor RE1-silencing transcription factor (REST) co-repressor	AI430496	O	vO	I	19	NM_054048	14q32.33	NM_015156	ACHM1/MCDR4/USH1A
TGTGTCATTT	34137 novel aldehyde dehydrogenase	AW060340	n	O	I	19	NM_028545	11q13	NM_000695	VRNI
GGGCAAGCCA	260481 ERRalpha	BF782180	P	P	P	19 A	NM_007953	11q13	NM_004451	VRNI
CACTTGCAGT	36417 ESTs	AI465201	P	scI(o)	PrI	19 A	NM_144871	11q13.2	NM_017635	VRNI
GAAGTGGAAG	234182 ESTs/contains actin similarity domain	AI843358	P	scO	Pr	19 A	NM_025463	11q12.3	NM_024099
GCCAGGACTG	28338 Pecanex-like 3	AA268806	P	vO	P	19 A	NM_144868	11q13.1	XM_170664	VRNI
AAAGCAAAAT	87450 oxysterol binding protein	BE692045	O	O	Pr	19 A	NM_007521	11q12.1	NM_002556
AGAATGACAG	246200 AYP1/hypothetical Copper amine oxidase, domains 1 and 2 structure containing protein	AI427339	O	vO(o)	PrI	19 A	NM_026616 // AYP1	11q13.1	NM_032193	VRNI
GTAGGATAGC	101780 similar to cleavage and polyadenylation specific factor 6	BE986835	O	O	I(pr)	19 A	NM_172302	11q12.3	NM_024811
AGGTGTACGT	34470 KIAA0937/novel homolog of deletex	AI851969	O	vO(o)	I	19 A	NM_172442	11q12.2	XM_166213
AGCAGGGATC	140 Ppp1r14b	AI385860	I-O	vO	M	19 A	NM_008889	11q13	XM_211798	VRNI
TACATTAATA	5262 choline kinase	AI852554	I	I(o)	n	19 A	NM_013490	11q13.1	NM_001277 // choline kinase	VRNI
TTTTCCCTTC	203928 syntaxin 3	AA210144	?	?	Pr	19 A	NM_011502	11q12.2	NM_004177
TGTGAACGAA	18522 carnitine palmitoyltransferase 1, liver	AI846647	?	O	Pr	19 A	NM_013495	11q13.1-q13.2	NM_001876	VRNI
ATGAATTGAG	70121 Cabp4 calcium binding protein 4	BF461761	?	O	Pr	19 A	NM_144532	11q13.1	NM_145200	VRNI
TCTCTCAGCC	3999 macrophage expressed gene	AA818891	?	?	Pr	19 A	XM_129176	11q12.2	XM_166227
GGGACTTAAG	234641 RORbeta	BE949786	sO(o)	vO	PrI	19 B	NM_146095	9q22	NM_006914
AGGAACCAAA	131943 6330504P12Rik: RIKEN cDNA 6330504P12 gene	AW491820	O	vO	M	19 B	AK031944	9q21.11	AL831949
CTATTCAGCA	2904 zinc finger protein 216	AW122171	O	O	PrI	19 B	NM_009551	9q13-q21	NM_006007
CTCACTCTTT	25339 metastasis associated 1-like 1/transcription factor	BE950121	O	O	I	19 B	NM_011842	11q12.3	NM_004739
GTGAGTGGCG	27953 Gldc glycine decarboxylase	BF150468	O	vO(o)	M	19 C	NM_138595	9p22	NM_000170
TTATGTATTA	136988 novel K channel	AI716138	O	O	PrB	19 C1	NM_183179	9p24.2	NM_133497
CCTCACTTAA	249310 ESTs	AI843462	P	P	P	19 C2	BC063101	10q23.32	NM_025235
CCCTCTCTCA	40322 Slit1	AI852961	sO(o)	svO(scI)	H	19 C3	XM_129317	10q23.3-q24	NM_003061
CAAGAGGCAC	122725 Meningioma expressed antigen 5 (hyaluronidase)	AW910305	O	vO	n	19 C3	NM_177133	10q24.1-q24.3	NM_024918
TGGATGCCTG	4524 LIM domain binding 1	AI844211	I(o)	I(o)	M	19 C3	NM_010697	10q24-q25	NM_003893 // LIM domain binding 1
AGTTCACCTG	28412 MMS19 (MET18 S. cereIsiae)-like	BE950773	I(o)	vO	Pr(is)A	19 C3	NM_028152	10q24-q25	NM_022362
TGATGGAATG	34404 Sema domain, immunoglobulin domain (Ig), transmembrane domain (TM) and short cytoplasmic domain, (semaphorin) 4G	AA238294	I	sscI(I)	A	19 C3	NM_011976	10q24.32	NM_017893
GGATTTGGAC	57223 helicase, lymphoid specific	BE953762	O	scI(o)	PrI	19 C3-D1	NM_008234	10q24.2	NM_018063
AACTGGGTCT	22085 Mus musculus ADP-ribosylation factor-like protein 3 (Arl3) mRNA, complete cds	AI892178	?	O	Pr(is)	19 D1	NM_019718	10q23.3	NM_004311
TGAATGTGAA	52043 Dual specificity phosphatase 5	AA511477	O	O	B	19 D2	CB571777	10q25	NM_004419
TTGTAAAATC	26062 AD024 protein (endosomal/kinesin-like?)	AI447803	O	vO	M(pr)	2	NM_025565	2q31.1	NM_020675	BBS5/RP26
TTGGAACCCT	34329 selenophosphate synthetase	AI846801	O	vO	PrI	2 A1	NM_175400	10p13	NM_012247
TATACATATC	44142 E030025C11Rik RIKEN cDNA E030025C11 gene	BF460707	I	I(o)	M	2 A1	BC025011	9p13.1	NM_016446
ACAAAACCAA	200196 interleukin 15 receptor, alpha chain	BE627836	?	I(o)	PrI	2 A1	NM_008358	10p15-p14	NM_002189
TTTCCTGTTT	266028 L-type Ca channel	AI846166	sI(o)	svI	sAG	2 A2	NM_023116	10p12	NM_000724
GGCATCTTGT	89933 ESTs/voltage-dependent calcium channel beta-2c	AW060387	O	O	PrI	2 A2	NM_023116	10p12	NM_000724
GGAGCAGGAC	2210 ATP-binding cassette 2	AI836521	sI+O	O	AG	2 A2-B	NM_007379	9q34	NM_001606
TTTTTGAACA	1008 prostaglandin D2 synthase	AI849257	R+CM	R+CM	R+CM	2 A3	NM_008963	9q34.2-q34.3	NM_000954
CAAAACTGTA	31255 Notch gene homolog 1, (Drosophila)	BE981557	O	vO	M	2 A3	NM_008714	9q34.3	NM_017617
CTGCACTCCT	29170 f-box and WD-40 domain protein 5	AI844243	O	I(o)	PrI	2 A3	NM_013908	9q34.3	NM_018998
AGAATGGCAG	46539 Notch-regulated ankyrin repeat protein	AW490993	O	vO	M	2 A3	NM_025980	ND	ND
GGAAGGTGGG	29046 neuropathy target esterase	AI838581	O	vO	PrI	2 A3	NM_146251	9q34.3	AK024443
TTGTTCCAAT	202841 Anaphase-promoting complex subunit 2	AI614286	O	O	?	2 A3	NM_175300	9q34.4	BC032503
GGGAGTGGGT	268933 EGF-like domain 7	AA879984	O	O	PrB	2 A3	NM_178444	9q34.3	NM_015416
GATAGAGAGT	1131 neural proliferation, differentiation and control gene 1	AI839030	I	I-vO(I)	A	2 A3	NM_008721	9q34.3	NM_015392
GAGGTCCTAG	5236 ral guanine nucleotide dissociation stimulator	AI843629	I	vO	P	2 A3	NM_009058	9q34.3	NM_006266
CACTTTGTGT	695 Ssh3bp1 spectrin SH3 domain binding protein 1	AI840745	?	O	Pr	2 A3	NM_007380	10p11.2	NM_005470
AATAAACTTT	7331 Pre B-cell leukemia transcription factor 3	AI427207	scI(O)	O	Pr	2 B	NM_016768	9q33-q34	NM_006195
TGGGGTTTCC	3129 Stxbp1 Syntaxin binding protein 1	BF782126	O	O	Pr(is)I	2 B	NM_009295	9q34.1	NM_003165
TAAATAGTTC	1318 Abelson murine leukemia oncogene	AI325092	O	vO-O-I(o)	P	2 B	NM_009594	9q34.1	NM_005157
CGCACCTCCT	142856 LIM homeobox protein 2	AW209799	O	vO	M	2 B	NM_010710	9q33.3	NM_004789
TATCTGTCTA	28805 Set SET translocation	AI844542	O	vO(o)	P	2 B	NM_023189	9q34	NM_003011
TAAAAAAAAA	221322 Nr6a1: Nuclear receptor subfamily 6, group A, member 1	AI849662	n	O	PrB	2 B	NM_010264	9q33-q34.1	NM_001489
CTTTCTCAAA	25504 ESTs/KIAA0515 ubiquitin-like motif?	AI853997	?	O	PrB	2 B	NM_172661	9q34.3	NM_032640
GGACAGTCTC	224354 Tsc1 tuberous sclerosis 1	AI837319	?	O	Pr	2 B-C1.1	NM_022887	9q34	NM_000368
CAGGCAGAAC	221029 weakly similar to cell cycle progression 2 protein	AA437956	?	?	Pr	2 C2	NM_177244	ND	ND
CAGTTGCAAT	4636 Neurod1 neurogenic differentiation 1	AI835157	sO	sscO	Pr(is)sB	2 C3	NM_010894	2q32	NM_002500	RP26
CGCGCGCGCA	30928 Solute carrier family 25 (mitochondrial carrier, Aralar), member 12	AI839531	P	P	P	2 C3	NM_172436	2q24	NM_003705
AGGGCTGTGT	26579 Spectrin repeat containing protein	AW495527	O	O	PrI	2 C3	AK011952	2q31.3	XM_010978	BBS5/RP26
ACTAAACCAT	209903 activating transcription factor 2	AW049652	O	O	PrI	2 C3	NM_009715	2q32	NM_001880	RP26
GCACACTATT	23836 Golgi reassembly stacking protein 2	AW763985	O	O	PrI	2 C3	NM_027352	2p24.3-q21.3	NM_015530
CTTCCCCTCC	87653 B830010L13Rik RIKEN cDNA B830010L13 gene	AI851853	O	vO(o)	M	2 C3	NM_178723	2q31.3-q32.1	NM_152520	BBS5/RP26
GAATAAAGAG	82561 protein kinase, interferon inducible double stranded RNA dependent activator	AA543453	?	O	P	2 C3	NM_011871	2q31.3	NM_003690	BBS5/RP26
AAATAAATAA	87653 B830010L13Rik RIKEN cDNA B830010L13 gene	AA024316	?	O	PrB	2 C3	NM_178723	2q31.3-q32.1	NM_152520	BBS5/RP26
TCCTTTGTAC	206814 metaxin 2	AW048643	P	P	P	2 D	NM_016804 // metaxin 2	2q31.2	NM_006554 // metaxin 2	BBS5/RP26
ACTGCCTGCT	41630 C1q and tumor necrosis factor related protein 4	AI848858	P	P	PrI	2 E1	NM_026161	11q11	NM_031909
ACTTTCTTTC	43636 zinc finger protein 289 (Zfp289)	AI845855	O	vO	P	2 E1	NM_023854	11p11.2	NM_032389
GTCACTATTT	41033 syntaxin 16 (Golgi t-SNARE)	AI841269	I	vO(o)	PrI	2 E1	BC036165	11p11.2	NM_006034
ACTGATGTCT	157502 ESTs/havefl/no obvious homology	AW046280	O	vO	I(pr)	2 E2	NM_026592	11p13	NM_138787	EVR3
CACTTTACTT	29730 four jointed box 1 (Drosophila)	AI465262	?	O	Pr	2 E2	NM_010218	11p13	NM_014344	EVR3
TGATGGTACT	8457 CD59a antigen	AI850091	?	O	I(pr)	2 E2-E4	NM_007652	11p13	NM_000611	EVR3
CAATCATTTG	3608 Pax6 Paired box gene 6	BF467581	P	scI	A	2 E3	NM_013627	11p13	NM_000280	EVR3
TTTTGTACTT	28542 ESTs, Weakly similar to similar to S. cereIsiae hypothetical protein YKL166 [C.elegans]	AI852060	I(sO)	O	Pr(is)	2 E3	NM_133749	15q13.2	NM_020154
TGTTTAAATG	45753 KIAA0013	BI695036	vI	vI	n	2 E4	NM_181416	15q14	NM_014783
AAGATTATTT	276022 ESTs, Moderately similar to AF071076_1 Nup98-Nup96 precursor/elongin/MUF1?	AI849286	sO(o)	vO(o)	PrI	2 E5	NM_172673	15q15.1	NM_032892
GCTGTGTAAT	247479 ESTs	AI180510	sO	O	I(pr)	2 E5	AF033666	ND	ND
GGCCAATGTA	41467 Pla2g4b phospholipase A2, group IVB (cytosolic)	AI839198	scI(p)	scI(vO)	I(pr)	2 E5	BC016255	15q11.2-q21.3	NM_005090
TGCTTGGCTA	141652 ESTs/chondroitin 4-sulfotransferase paralog	AW742878	P	O	PrI	2 E5	NM_028117	3q26.2	NM_005025
ACAAGTGCTC	233935 ESTs, Weakly similar to KIAA0377 [H.sapiens]	AI450926	?	?	Pr	2 E5	NM_178795	15q15.1	NM_014659
TATGTGTGCG	41271 Stard7 START domain containing 7	AI852671	P	O+sscI	Pr(is)	2 F1	NM_139308	2q11.1	NM_020151
AGACAGGGAA	27359 ESTs/nephropthisis protein	BE848456	P	O	PrI	2 F1	NM_175125	18q21.2	ND	CORD1
ACCAAGGCAA	4852 Mertk c-mer proto-oncogene tyrosine kinase	AI528587	?	vO(o)	PrI	2 F1	NM_008587	2q14.1	NM_006343
TGGGTCAAAC	260334 ESTs/novel protein kinase	AW047494	?	?	PrB	2 F2	NM_183262	20p13	NM_080836
TATATTAAAT	4435 Snap25 synaptosomal-associated protein 25	BE951307	sI(so)	I(sO)	G	2 F3	NM_011428	20p12-p11.2	NM_003081
GTGTTACATT	45179 WD40 protein Ciao1	BE948693	P	scI(o)	?	2 F3	NM_025296	2q11.2	NM_004804
AATGATAAAA	29363 Nol5a nucleolar protein 5A	BE292047	O	vO	n	2 F3	NM_024193	20p13	NM_006392
TGAGTTCGCT	41638 6330527O06Rik RIKEN cDNA 6330527O06 gene	AI836669	n	scI	sA	2 F3	NM_029530	20p12	NM_012261
TGACTAGCGT	1339 chromogranin B	AI385633	sO(o)	scI(o)	AH	2 F-G	NM_007694	20pter-p12	NM_001819
CCAAGAAAAG	41936 cell diIsion cycle 2-like 5	AI853555	P	O	PrI	2 G1	NM_026425	20p11.23	NM_016100
CCCGTGACCT	115124 brain protein 14	AI716898	O	O	PrI	2 G3	NM_019632	20p12.3-p11.21	XM_046652
TGTTTCACCG	444 inhibitor of DNA binding 1	AA762488	sO(o)	vO	n	2 H1	NM_010495	20q11	NM_002165
GAGAACTCAA	25410 ESTs/unknown function	BG230102	sO	vO	Pr	2 H1	NM_025853	20q11.23	NM_024918
GGGGGAGTGG	140956 neuronatin	AW492477	scI(so)	scI(vo)	n	2 H1	NM_010923	20q11.23	NM_005386
GCAGGGGGCA	23692 Casein kinase II, alpha 1 related sequence 4	BF464577	O	O	PrI	2 H1	NM_007788	20p13	NM_001895
CCCAGGCTTG	22845 c-src	AI846653	O	vO	M	2 H1	NM_009271	20q12-q13	NM_005417
GCGGCGCCGC	29477 SCAN domain-containing 1	AI854100	O	O	PrI	2 H1	NM_020255	20q11.1-q11.23	NM_016558
AGCCAGCCCC	3881 Tcf15 Transcription factor 15	AW744685	?	?	Pr	2 H1	NM_009328	20p13	NM_004609
CCTTACCGCT	206869 ESTs, Weakly similar to JAK3_MOUSE TYROSINE-PROTEIN KINASE JAK3 [M.musculus]	AI854265	P	vO(p)	PrI	2 H2	BC028327	NULL	NULL
CCCTGGACAT	7444 vesicular inhibitory amino acid transporter	BF457137	n	scI	sA	2 H2	NM_009508	20q11.23	NM_080552
TATGCAAACT	11738 serine/threonine kinase 6	BE572559	sO	vO	n	2 H3	BC005425	20q13.2-q13.3	NM_003158
ATGGATAAAG	2229 eyes absent 2 homolog (Drosophila)	AW060282	sO	n	PrI	2 H3	NM_010165	20q13.1	NM_005244
TGGTGAGAGG	40297 ESTs/Kv2.1 potassium channel	AI852064	O	scO(I)	Pr(is)	2 H3	NM_008420	20q13.2	NM_004975
AATGAAAAAA	595 BMP7	BM070091	I	vO	M	2 H3	NM_007557	20q13	NM_001719
CACTGATTTA	34319 3 monooxgenase/tryptophan 5 monooxgenase activation protein, beta polypeptide	W81923	I	I(vO)	G	2 H3	NM_018753	20q12-q13.12	---
TGACTTGGTA	29912 ESTs, Moderately similar to molybdopterin synthase sulfurylase [H.sapiens]	AI839519	?	?	Pr(is)B	2 H3	XM_130596	20q13.13	NM_014484
none	246260 ESTs	AI851523	O	vO	M	2 H3	XM_111810	20q13.12	NM_032883
CTTCTGCCTG	22358 1500004O14Rik RIKEN cDNA 1500004O14 gene	AI846500	?	O	PrB	2 H4	NM_025901	16p13.3	NM_016310
GCAGAGATGG	232400 ESTs, Highly similar to URACIL PHOSPHORIBOSYLTRANSFERASE [Saccharomyces cereIsiae]	AI851238	?	O	Pr	2 H4	NM_026765	20q13.33	NM_017859
TACAAAACTG	133687 ESTs/similar to OATP-E	AA473599	?	O	Pr(is)B	2 H4	NM_148933	20q13.33	NM_016354
CAGACTATAA	29308 protein L-isoaspartate-O-methyltransferase homolog	BE447981	?	scO(o)	Pr(is)	2 H4	NM_153594	20q13.33	NM_018257
GTTCTGTCTT	260164 short chain L-3-hydroxyacyl coenzyme A dehydrogenase	AI846363	O	vO	Pr	3	NM_008212	4q22-q26	NM_005327	WFS2
CTGTAATCTT	126753 myomegalin	AI840910	I	O(sci)	Pr(is)	3	NM_022382	1q21.3	XM_290895	CORD8
GGGTGGGGTG	44292 trinucleotide repeat containing 4	AW047928	I	scI(o)	I	3	NM_172434	1q21	NM_007185	CORD8
TCAAACTTGG	741 fatty acid binding protein 5, epidermal	AI853846	sO(I)	O	n	3 A1	NM_010634	8q21.11	NM_001444 // fatty acid binding protein 5 (psoriasis-associated)
TGGTCTCTTA	41522 Zfh4	BF147593	sI	svO(sI)	sB	3 A1	NM_030708	8q21.11	NM_024721
AGACAAACTG	1186 carbonic anhydrase 2	AI841511	n	vO	M	3 A1	NM_009801	8q22	NM_000067
AAGTAAGTCT	212908 glucocorticoid-induced gene 1	AA939689	>	O	I	3 A1	NM_133218	8q21.13	ND
CTCTCAAATT	47052 1700008G05Rik RIKEN cDNA 1700008G05 gene	BM938624	?	O	Pr	3 A1	XM_130784	ND	ND
AATCATTGTT	2777 tumor protein D52/possible protein kinase	AI851246	O	vO	M(pr)	3 A1-A2	NM_009412	8q21	NM_005079
TATATATTTG	4541 SRY-box containing gene 2	AI852207	sO	vO	n	3 A3	NM_011443	3q26.3-q27	NM_003106
TAGAACACTG	23823 Prkcl protein kinase C, lambda	BF167555	O	O	I(pr)	3 A3	NM_008857	3q26.3	NM_002740
AAAATTGCTT	3360 3 monooxgenase/tryptophan 5 monooxgenase activation protein, zeta polypeptide	AA221554	I(sO)	vI+vO	G	3 A3	NM_026332	3q27.2	NM_145261
TGTCAAGGTT	159633 ESTs	BE984591	?	O	Pr	3 A3	XM_130828	3q26.31	NM_182610
TTTGCCATAC	40321 progesterone membrane binding protein	AI847934	sscO	n	sG	3 B	XM_130859	4q26	NM_006320
AAAATGTAAA	33367 ESTs	AI853026	P	P	PrI	3 B	NM_172680	4q28.1	BC045783
TCTGAATATA	86483 sprouty homolog 1 (Drosophila)	BE553573	O	O	n	3 B	NM_011896	4q28.1	XM_036349
AGACTACCTG	18048 ESTs, Moderately similar to ZINC FINGER Y-CHROMOSOMAL PROTEIN 1 [Xenopus laeIs]	AW122326	O	O	PrI	3 B	NM_144519	3q27.1	NM_016331
GATCTCTTGT	151332 peroxin 2	AW060724	?	O	Pr	3 B	NM_021483	3q27.1	NM_016559
AACTTGCCAG	46503 Elf2 E74-like factor 2	BE630438	O	O	PrI	3 C	NM_023502	4q28	NM_006874
TGGCAGAAGC	62589 4930583H14Rik RIKEN cDNA 4930583H14 gene	AI195347	O	vO	IAG	3 C	NM_026358	4q31.1	NM_032623
ATCAATAAAT	39298 double cortin and calcium/calmodulin-dependent protein kinase-like 1	AI854218	I	I	sA	3 C	NM_019978	13q13-q14.1	NM_004734
CCTGGTGCAG	43731 Component of oligomeric golgi complex 6	BF160911	?	?	Pr	3 D	NM_026225	13q13.3	NM_020751
CAAATCCAAA	215653 PLC-like	BC052372	sO	svO	n	3 E1	NM_183191	3q25.31	BC043248
ATGCCCTCAA	19155 Secreted frizzled-related sequence protein 2	AI851596	sO	n	n	3 E3	NM_009144	4q31.3	XM_050625
TAAAAAAAAA	41560 serine protease inhibitor 17	AI837402	P	O(sci)	PrI	3 E3	NM_009250	3q26.2	NM_005025
TTGTCTTTGA	89955 mab-21-like 1 (C. elegans)	BF467562	scI(o)	scI(o)	A(pri)	3 E3-F1	NM_010750	13q13.3	NM_005584.2
TTCTCCCCAC	36715 Pmf1 polyamine-modulated factor 1	AW060657	sO	vO	I(pr)	3 F1	NM_025928	1q12	NM_007221	CORD8
GGAGCACTGG	272927 Dpm3 dolichyl-phosphate mannosyltransferase polypeptide 3	AW493485	P	O	PrA	3 F1	BC037761	1q21.3	NM_018973	CORD8
CCCAGAGGAG	23742 nestin	BE981380	O	O	n	3 F1	NM_016701 // nestin	1q23.1	X65964	CORD8
TTACAAGCCT	3049 Cks1 CDC28 protein kinase 1	AI463659	O	O	n	3 F1	NM_016904	1q21.2	NM_001826	CORD8
TTACAAGCCT	3049 Cks1 CDC28 protein kinase 1	AI463659	O	scI(o)	PrI	3 F1	NM_016904	Ambig	Ambig
CTTCATCTGA	18268 CDC-like kinase 2	AI839804	I(o)	O(I)-scO	PrI	3 F1	NM_007712	1q21	NM_001291	CORD8
GTTGGTCTGT	177991 ESTs	AI848699	I(o)	vO(p)	I(pr)	3 F1	NM_025327	1q22	NM_173852	CORD8
GGAAAGAATG	129355 KIAA0446/similar to yeast mitochondrial carrier protein	AI847749	I(o)	I(o)	P	3 F1	NM_178696	1q21.3	---	CORD8
none	183137 Keratin complex 2, basic, gene	AI070370	?	O	Pr	3 F1	NM_146131	1q22	NM_020524	CORD8
TTTAAGAATT	253961 dsRNA adenosine deaminase	AI842795	?	O	Pr	3 F2	NM_019655	1q21.1-q21.2	NM_001111	CORD8
CTTAATGTAT	218657 Cerebellar ataxia 3	AI843178	O	scO	Pr(is)B	3 F2.1	NM_023210	1q21.2	NM_030920	CORD8
GGGGCTCTGT	1635 ESTs/PIAS3	AI835963	n	scO	Pr	3 F2.1	NM_018812	1q21	NM_006099	CORD8
AAGTCCTTCA	1135 carboxypeptidase A	AI842664	P	P	n	3 F2.1-2.2	NM_033573	1q21.1	NM_005973	CORD8
ACGCAACTGT	25877 putative homeodomain transcription factor	AW049785	O	O	PrI	3 F2.2	NM_013629	1p13	NM_006608
ACCCTTTCAC	9086 solute carrier family 16 (monocarboxylic acid transporters), member 1	AI854532	?	?	PrI	3 F2.2	NM_009196	1p12	NM_003051
TGTTCGTCCT	34855 KIAA0806 (contains 3 Ig domains)	BE686752	?	vO(o)	PrB	3 F2.2	XM_194114	1p13.1	NM_014813
none	10740 Wnt13/2b	AF070988	O	vO	n	3 F2.2	NM_009520	1p13	NM_004185
GGACACTGTA	255822 Calcium/calmodulin-dependent protein kinase II, delta	BE981488	I	I(svO)	sAH	3 G2	NM_023813	4q26	NM_001221
TGTATAAATA	20922 Mitogen-activated protein kinase kinase 1 interacting protein 1	AI607391	sO(o)	O	P	3 G3	NM_019920	4q22.3	NM_021970	WFS2
ATGTATGAAA	9811 2310008M10Rik RIKEN cDNA 2310008M10 gene	AI836697	P	I(o)	AG	3 G3	NM_025509	4q25	NM_021227
TAAGTGAAAA	28893 LOC229877 Similar to guanine nucleotide exchange factor smgGDS	BE986885	sO(o)	scI(o)	I(pr)	3 H1	NM_145544	4q23-q25	NM_021159	WFS2
TACAAATGTA	24430 unc5 homolog (C. elegans) 3	AA387900	O	O	Pr	3 H1	NM_009472	4q21-q23	NM_003728 // unc5C	WFS2
ACAAAGGTTA	29187 Lmo4 LIM domain only 4	AI563648	sI	I	A	3 H2	NM_010723	1p22.3	NM_006769
GAAATAAAAT	276027 ESTs	AI845960	O	O	Pr	3 H2	NM_025555	1p22.3	XM_086187
TCTTGCTGCA	234247 Dimethylarginine dimethylaminohydrolase 1	AW046009	vO	O	M	3 H3	XM_131205	1p22	NM_012137
GTGACTTTGC	137653 Ubiquitin specific protease 33	AI846787	I	vO	n	3 H3	NM_133247	1p31.1	NM_015017
ACTGATGCAA	89623 mCastor	BB542435	scO	vO(o)	Pr	4	BC035954	1p36.22	BQ188241	LCA9
AAGCCAGTGA	34028 ESTs, Moderately similar to KIAA0494	AI854731	O	vO	n	4	BC028320	1pter-p22.1	NM_014774	LCA9
CTATTTAATG	41877 ESTs, Weakly similar to mCAC [M.musculus]	AI853021	O	scO	Pr(is)	4	NM_027460	1p36.22	NM_032315	LCA9
CAGAAAGGCA	29227 ESTs	BE861419	?	?	M	4	BC049168	1p36.11	BG716002	LCA9
TATTTTGAAG	38877 ESTs	AW489288	O	O	PrI	4 A2	NM_181401	8q21.3	XM_095568
AGTTTAAGGG	295566 ESTs, Weakly similar to AF234765_1 serine-arginine-rich splicing regulatory protein SRRP86 [R.norvegicus]	BE985103	sO	O	PrI	4 A3	AK012036	6q16.3	NM_032870	LCA5
TCTGCGTCCT	76278 2610203K23Rik RIKEN cDNA 2610203K23 gene	AI854567	sO	vO	?	4 A5	NM_021535	9p12	NM_018225
CGCCCTGGGA	24337 PDZ-binding kinase	AW489104	O	O	PrI	4 A5	NM_023209	8p21.2	NM_018492	ROA1
CTGTGTGGCC	1361 glycoprotein hormones, alpha subunit	BE948311	n	O	n	4 A5	NM_009889	6q14.3	NM_000735	RP25/LCA5/MCDR1
GAAGGACTGG	229444 Gba2 glucosidase beta 2	AI841599	n	I(si)	AH	4 A5	NM_172692	9p13.1	NM_020944
none	646 tropomyosin-2	AI844503	O	O	P	4 B1	NM_009416	9p13.2-p13.1	NM_003289
TGCTTCAATT	24765 ring finger protein 20	AI848804	n	I-vO	n	4 B1	NM_182999	9q31.1	NM_019592.4
GCTCTGACTG	30935 tudor repeat associator with PCTAIRE 2	AI447470	?	O	Pr	4 B1	NM_146142	9q22.33	NM_014290
GGCCCAATGA	17804 Solute carrier family 31, member 2	BE851825	O	O	PrI	4 B3	NM_025286	9q31-q32	NM_001860
TTCCTGATAG	196846 RAD23b	AW610670	I(o)	O	PrI	4 B3	NM_009011	9q31.2	NM_002874
GTAAAAAAAC	7622 A kinase anchor protein 2	AA451000	?	scI(o)	P	4 B3	NM_009649	9q31-q33	NM_007203
AATAAACTTA	31178 rho, GDP dissociation inhibitor (GDI) beta/raga	AI591552	I	O	P	4 C4	NM_178376	9p21.3	NM_006570
ACACTTGCTA	4756 leptin receptor	AI447090	O	O	PrI	4 C6	NM_175036	1p31.2	NM_017526
TATTAAATGT	27363 phosphatidic acid phosphatase type 2B	AI847054	n	O	Pr	4 C6	NM_080555	1p32.2	NM_003713
CTGTAGAAAT	27496 Usp1 ubiquitin specific protease 1	AI848382	?	O	Pr	4 C6	NM_146144	1p32.1-p31.3	NM_003368
GAGAACACAC	30001 ESTs, Highly similar to TRANSCRIPTION FACTOR BTF3 [Homo sapiens]	AI849111	P	microglia(scio)	?	4 C7	NM_027453	NULL	NULL
CCCCCCGTCA	140496 Fanconi anemia complementation group E homolog	BE285331	P	P	Pr(is)A	4 C7	NM_029565	1p36-p31	NM_004872	LCA9
TTTGCGATAA	134468 EAAT-5	BI735025	O	O	Pr	4 C7	NM_146255	1p32.3	NM_006671
AGGGAAAAAA	202758 Hypothetical protein MGC38941	AW060259	sO	scI(O)	I(pr)	4 D1	NM_153521	1p34.1	NM_006369
CAGAGCCCAC	9287 microtubule associated testis specific serine/threonine protein kinase	AI846191	I(o)	vO	PrB	4 D1	NM_008641	1p34.1	NM_015112
GGGTTTTTAT	21054 Y box protein 1	AA671610	I	I(vO)	I+G	4 D1	NM_011732	1p34	NM_004559
GAAACCAGGA	45994 tetraspannin 1	AI593844	?	O	Pr	4 D1	NM_133681	1p34.1	NM_005727
GTGCTGGTGG	5243 opiod receptor delta	AW489536	O	O	Pr	4 D1-D3	NM_013622	1p36.1-p34.3	NM_000911	LCA9
TTTCTCCCTC	23104 ESTs, Weakly similar to PRP3_MOUSE PROLINE-RICH PROTEIN MP-3	AI838606	O	O	Pr	4 D2.1	NM_008135	1p33	NM_006934
TGGCCAAGCC	14198 Early development regulator 2	AI854599	O	vO	PrI	4 D2.2	NM_018774	1p34.3	NM_004427
CTTTGGGGGC	258547 ESTs	AI413621	O	vO	I	4 D2.2	XM_149496	1p34.2	XM_059173
GGGTTCCCCT	41860 Procollagen, type XI, alpha	AI838662	n	sscI	AG+Pr	4 D2.2	NM_028266	1p35-p34	NM_001856
TCTCTGACTT	2769 MARCKS-like protein	BE952194	I(so)	scI(vo)	n	4 D2.2	NM_010807	1p34.3	NM_023009
CTCCCGCTGG	31170 Cited4 Cbp/p300-interacting transactivator, with Glu/Asp-rich carboxy-terminal domain, 4	AI463252	?	CM(o)	Pr(is)A	4 D2.2	NM_019563	1p34.1	NM_133467
GTTTTAAAAA	28038 DNA segment, Chr 4, ERATO Doi 421, expressed	BE852557	?	vO(o)	P	4 D2.2	NM_026560	1p34.2	NM_018101
TTTAGGGGAG	22440 Thrap3 thyroid hormone receptor associated protein 3	AI836625	?	?	PrI	4 D2.2	NM_146153	1p34.3	NM_005119
TGGACACTTT	34701 Pum1 pumilio 1 (Drosophila)	AI846170	sO	svO	M	4 D2.3	NM_030722	1p35.2	NM_014676
TCCCCTGTAC	1430 Eya3	BE981322	O	O	PrI	4 D2.3	NM_010166	1p36	NM_001990	LCA9
TATAGTTTGT	29685 DnaJ (Hsp40) homolog, subfamily C, member 8	BE987505	I(o)	I(o)	?	4 D2.3	NM_172400	1p35.2	NM_014280
ACAAAAATGA	30038 erythrocyte protein band 4.1	AI840295	?	O	Pr	4 D2.3	XM_358629	1p35.3	AL110282
AGAAGGAGGT	28479 Stmn1 stathmin 1	BE995867	I(sO)	I-vO	n	4 D3	NM_019641	1p36.1-p35	NM_005563 // stathmin 1	LCA9
TGATGTATAT	110 inhibitor of DNA binding 3	AA959254	I(o)	svO(o)	M	4 D3	NM_008321	1p36.13-p36.12	NM_002167	LCA9
CAGGTTGGTT	46513 2610200G18Rik RIKEN cDNA 2610200G18 gene	AI844811	I(o)	vI(o)	n	4 D3	NM_025998 // RIKEN cDNA 2610200G18	1p35.1	NM_024522 // hypothetical protein FLJ12650
GGGTTTGGAG	21657 ESTs, Weakly similar to Ig heavy chain precursor [M.musculus]	AI838775	I	scI	sAG(pri)	4 D3	BC038057	NULL	NULL
CAAGCTTCTG	103489 GMEB1l (glucocorticoid modulatory element binding protein)	AI552264	?	O	Pr	4 D3	NM_020273	1p35.2	NM_006582
AATAAATTAC	46473 3110024A21Rik RIKEN cDNA 3110024A21 gene	BF461536	?	O	P	4 D3	NM_024215	1p35.3	NM_015871
TGTTATGAGA	25581 ESTs	AI834770	?	O	I	4 D3	NM_025667	1p35.3	NM_032125
ATTGTTTATG	911 High mobility group nucleosomal binding domain 17	AI836705	sO	sO	Pr(is)sA	4 D3	NM_016957	1p36.1	NM_005517	LCA9
AGCCAGCCAG	80685 LOC230872 rootletin	AI430252	?	sscO(o)	Pr(is)B	4 E1	NM_172122	1p36.13	NM_032723	LCA9
none	90587 Enolase 1	AI841389	sO(o)	sCM(vO)	Pr(is)MsG	4 E2	NM_023119	1p36.3-p36.2	NM_001428	LCA9
TGCCACTGCC	3400 Dsh1	AI854114	P	P	P	4 E2	NM_010091	1p36	NM_004421
GACACCAGAG	197523 acyl CoA hydrolase	AI576291	P	P	P	4 E2	NM_133348	1p36.31-p36.11	NM_007274	LCA9
TGGGAGAACA	137268 Hes5 Hairy and enhancer of split 5	BF457074	O	scI(o)	?	4 E2	NM_010419	1p36.11-36.33	AL139246	LCA9
none	45320 ESTs	BG293990	n	O	Pr	4 E2	XM_110485	1p36.22	NM_017766
AAATAAAGTC	193413 ESTs, Moderately similar to KIAA0264 [H.sapiens]/agrin	AI835267	I	vI+O	A	4 E2	NM_021604	1p36.33	BC007649	LCA9
GAGCCGCCCT	139166 ESTs	AI854095	?	O	Pr	4 E2	NM_021303	1p36.33	NM_015658	LCA9
CAGGACACCT	248651 ESTs/prenylcyteine carboxylmethyltransferase	AW494010	?	scO(vO)	Pr(is)	4 E2	XM_131821	1p36.21	NM_012405	LCA9
TGGGCATAGC	34113 VPS10 domain receptor protein SORCS 2	AI849869	sO	vO	M	5	NM_030889	4p16.1	NM_020777	STGD4/MCDR2
GTAATGTGGA	184559 ESTs/cyclin D-binding myb-like transcription factor	AI448589	?	?	Pr	5 A1-h	XM_194190	7q21.1-q21.2	NM_024315
TTAATAAACC	8709 serine/arginine-rich protein specific kinase 2	AW492537	O	vO(o)	Pr	5 A3	NM_009274	7q22-q31.1	NM_003138
ACTTCAGACT	21629 ATP-binding cassette, sub-family F (GCN20), member 2	AI837318	O	vO	M	5 A3	NM_013853	7q36	NM_005692
GGGAACGCAC	5856 NY-REN	AI835411	I(sO)	O	Pr(is)I	5 A3	NM_016736	7q36	NM_016118
GAGATTCAGT	1469 protein tyrosine phosphatase, non-receptor type 12	AA832672	P	P	Pr	5 A3-B	NM_011203	7q11.23	NM_002835
GTTTGTCAGC	6904 Fibroblast growth factor receptor 3	AI854659	P	P	P	5 B	NM_008010	4p16.3	NM_000142	STGD4/MCDR2
CTGAAAAAGT	273765 ESTs, Highly similar to PHOSPHATIDYLSERINE DECARBOXYLASE PROENZYME [Cricetulus griseus]	AI835300	?	?	M	5 B1	NM_177298	22q12.2	NM_014338
ACTTCAGACT	256508 Mblk1-related	AI448496	P	vO(o)	PrI	5 B3	NM_172153	7q36	NM_005692
TAAAGACACA	25785 Ldb2 LIM domain binding 2	AI853861	O	O	PrI	5 B3	NM_010698	4p16	NM_001290 // LIM domain binding 2	STGD4/MCDR2
CCTCAGGGAT	30624 endothelial-derived gene 1	AI836639	O	vO	PrI	5 B3	NM_025895	4p16	NM_025205	STGD4/MCDR2
CTTTGTTGGG	34584 Slit2	BE981384	O	O	PrI	5 B3	NM_178804	4p15.2	NM_004787	STGD4/MCDR2
GAAACCAGGA	30688 4932414K18 hypothetical protein 4932414K18	AI450970	?	O	PrB	5 B3	NM_173764	4p15.33	NM_153365	STGD4/MCDR2
GCCTCCTCCT	148877 replication factor C, 140 kDa	AI841048	O	O	PrI	5 C	NM_011258	4p14-p13	NM_002913	STGD4
AAAACTCTGC	180561 recombining binding protein suppressor of hairless	AI843960	O	O	PrI	5 C1-C3	NM_009035	4p15.2	NM_005349	STGD4/MCDR2
AATAAATTAC	56905 Tbc1d1 TBC1 domain family, member 1	AI893965	P	vO+vI	P	5 C3.1	NM_019636	4p14	NM_015173	STGD4
GGATGTAGAG	10082 Hip2/ubiquitin conjugating enzyme	BE630394	?	O	A	5 C3.1	NM_016786	4p14	NM_005339	STGD4
CTCTGAGAAG	1921 ESTs, Moderately similar to KIAA0826 protein [H.sapiens]	AI836821	?	O	Pr	5 C3.2	NM_028194	4p12	XM_093839	STGD4
GTGGTGTGGT	2924 platelet derived growth factor receptor, alpha polypeptide	AI851139	O	O	PrI	5 C3.3	NM_011058	4q11-q13	NM_006206
TGGGTTTTTT	4394 kit oncogene	AI020663	O	vO	sA	5 C3.3	NM_021099 // c-kit	4q11-q12	NM_000222
GCACCTCTTA	218240 hnRP U	AI837264	P	P	P	5 E1	NM_027530	4q21.1	NM_014961
TCCTCCGGCT	37819 D5Bwg0860e DNA segment, Chr 5, Brigham & Women's Genetics 0860 expressed	AI851374	I	I(o)	PrI	5 E1	NM_027530	4q13.3	NM_014961
AAAATTACAG	22822 ESTs	AI510037	O	O	PrI	5 E2	XM_132134	4q13.3	BC032771
TGGCTTACAG	39288 Scavenger receptor class B, member 2	AI839993	sscO(vO)	I+sO-vO	sPrsB	5 E3	NM_007644	4q21.21-q21.22	NM_005506
GAGTCTGAAT	44124 PR domain containing 8	AI594999	?	scI(o)	I(pr)	5 E3	NM_029947	4q21	NM_020226
TACTGCTGAT	250419 Ccni cyclin I	AA839404				5 E3.3-F1.3	NM_017367	4q21.22	NM_006835
GTAAATGCAA	46019 Wdfy3 WD repeat and FYVE domain containing 3	AI842852	?	O	Pr	5 E4	AB093277	4q22.1	NM_014991	WFS2
CTGAGGAAGT	29027 SPARC-like 1 (mast9, heIn)	AI851745	?	?	AG	5 E4	NM_010097	4q22.1	NM_004684	WFS2
GCGACACCTG	46764 CDP-diacylglycerol synthase 1	AI844295	n	n	Pr	5 E5	NM_173370	4q21.23	NM_001263
GGAGCTCCGG	4079 1110038H03Rik RIKEN cDNA 1110038H03 gene	AI848723	sO+I	vO(o)	M	5 F	NM_177876	12q24.31	NM_024667
CTTGTAGCTG	44854 ESTs/no obvious ORF	AW050310	sO	svO	n	5 F	AK028326	22q12.1	ND
TGTAAAATAA	226873 myosin IH	AI836648	sO	vO	I(pr)	5 F	NM_026145	12q24.12	NM_173597
CAGTTTAAGT	17709 ESTs/Foxn4	BE985700	sO	O	M(pr)	5 F	NM_148935	12q24.12	XM_062735
CCCACCCCCC	158631 ESTs/weak homology to calmodulin+caltractin	AW050070	sO	O	PrI	5 F	XM_132295	12q24.31	NM_144668
TCGCTGGCAC	27921 GAK_MOUSE Cyclin G-associated kinase	BF460720	sI	vO	PrI	5 F	XM_132229	4p16	NM_005255	STGD4/MCDR2
TCCCCGTCAT	38184 Dr1 down-regulator of transcription 1	AW122207	O	O	Pr(is)I	5 F	NM_026106	1p22.1	NM_001938
AAAGCAGTGC	34216 Unc-51 like kinase 1 (C. elegans)	AI850194	Iso)	vO	A	5 F	NM_009469	12q24.33	NM_003565 // unc-51-like kinase 1
TCAGAGGCCT	5195 complexin 1	AI845052	?	sI	sA+sG	5 F	NM_007756	4p16.3	NM_006651	STGD4/MCDR2
AACACACAGT	286367 Rabgef1 RAB guanine nucleotide exchange factor (GEF) 1	BE305992	?	O	Pr	5 F	NM_019983	7q11.21	NM_014504
AGGACGGAGG	20488 ESTs, Weakly similar to Fln29 [H.sapiens]	AW060799	?	O	Pr	5 F	NM_172275	12q24.13	NM_006700 // FLN29 gene product
GAAAATGAGA	3981 COP9 (constitutive photomorphogenic), subunit 6 (Arabidopsis)	AI852658	sO	vO	I	5 G2	NM_012002	7q22.1	NM_006833
CAGCGGGAGC	6225 syntaxin 1A	AI837875	sO	scI(vO)	P	5 G2	NM_016801	7q11.23	NM_004603 // syntaxin 1A (brain)
GGAAGGAGGG	46533 ESTs, Highly similar to AF132954_1 CGI-20 protein [H.sapiens]	AW493256	O	O	PrI	5 G2	NM_026269	7p22.3	NM_015949	CYMD
CTAGTGACTG	29605 ESTs, Moderately similar to similar to PID:g3877944 [H.sapiens]	BE987491	O	scI(o)	I(pr)	5 G2	NM_177682	7p22.2	NM_015622	CYMD
none	6256 frizzled 9	BE983591	O	O	M(pr)	5 G2	XM_284144	7q11.23	NM_003508
AGACTCAATT	2950 Pms2 postmeiotic segregation increased 2 (S. cerevisiae)	AW822599	?	O	P	5 G2	NM_008886	7p22	NM_000535	CYMD
GAAATTTAAA	16421 high mobility group box 1	AI850329	sO(o)	vO	A	5 G3	NM_010439	13q12	NM_002128
ATGGCCGTAG	167971 Usp12 ubiquitin specific protease 12	BE200409	I(sO)	O	Pr(is)B	5 G3	NM_025652	5q33-q34	XM_171244
TATCTGAAAT	194 FMS-like tyrosine kinase 3	AI323643	?	?	n	5 G3	NM_010229	13q12	NM_004119
GAAGTACGTC	100354 ESTs	AI844429	?	?	AH	5 G3	NM_029920	13q12.3	XM_166270
GAAATGGCCT	153457 chromosome condensation-related SMC-associated protein 1	AI851968	O	vO	n	6	AK019259	1q32	NM_006763	AXPC1
TTCTAAAGAA	220345 ESTs	BF465573	O	O	Pr	6	ND	16q24.1	NM_014732
TTTCCTGTTT	1440 tachykinin	BE954293	sI(o)	svI	sAG	6 A1	NM_009311	7q21-q22	NM_003182
CAAATCCCCC	27320 Glucocorticoid induced transcript 1	AW490854	O	sO(o)	ast+PrI	6 A1	NM_133236	7p22.1	XM_166529	CYMD
AGAGCTGGTT	95398 Gng1 guanine nucleotide binding protein (G protein), gamma 1 subunit	BE954673	n	n	Pr(is)	6 A1	NM_010314	7q21.3	NM_021955
TTTATTTCAT	2469 split hand/foot deleted gene 1	AI849481	sO	vO	?	6 A2	NM_009169	7q21.3-q22.1	NM_006304
GGGCCTGCTC	260707 Inosine 5'-phosphate dehydrogenase 1	AI848836	?	?	Pr(is)	6 A3	NM_011829	7q31.3-q32	NM_000883
CAACTTAGCA	20465 G protein-coupled receptor 37	AI848630	scI(o)	vO(o)	M	6 A3.1	NM_010338	7q31	NM_005302
TTATGGCAGT	27673 D6Wsu176e DNA segment, Chr 6, Wayne State University 176, expressed	AI841826	O	O	Pr(is)	6 A3.1	NM_138587	7q22.1-q31.1	NM_014888
TAAGATGGCA	41063 Tripartite motif protein 24	AI847505	scI(p)	scI(p)	PrI	6 B1	NM_145076	7q32-q34	NM_003852
TAAGTGCGGA	1089 mesoderm specific transcript	BE944385	O	vO	PrI	6 B1	NM_008590	7q32	NM_002402
GCCACTCTAC	451 Aldo-keto reductase family 1, member B3 (aldose reductase)	AI844017	O	vO	?	6 B1	NM_009658	7q35	NM_001628
TGATAAAAGT	42183 CCR4-NOT transcription complex, subunit 4	AW124398	O	O	PrI	6 B1	NM_016877	7q22-qter	NM_013316
TTAACCAACT	224010 ESTs, Weakly similar to ubinuclein 1	AI447565	I(o)	vO(o)	Pr(is)I	6 B1	NM_177185	7q34	AB107352
CTGGCCATCT	4525 Cdh11 Cadherin 11	BE948121	P	I(o)	I(pr)	6 B2.3	XM_196548	16q21	NM_001797
CTTTTTCTTT	28148 chromobox homolog 3 (Drosophila HP1 gamma)	AI844654	O	vO(o)	PrI	6 B2.3	NM_007624	7p15.2	NM_007276	CYMD
TTTTACTTTC	18496 Igf2bp3 Insulin-like growth factor 2, binding protein 3	BF456970	O	vO	Pr	6 B2.3	NM_023670	7p11	NM_006547
TGGGGAAGAG	88790 1500010G04Rik RIKEN cDNA 1500010G04 gene	AA144142	O	vO	I+G	6 B2.3	NM_173366	7p15.3	NM_013293	CYMD
CATTCAAAAA	154796 Mus musculus preproneuropeptide Y (Npy) mRNA, complete cds	AI848386	n	ssI	sA+H	6 B2.3	NM_023456	7p15.1	NM_000905 // neuropeptide Y	CYMD
AAAGATAACT	32416 ESTs	AI450458	?	?	Pr	6 B2.3	NM_175098	7p15.3	NM_138771	CYMD
CTACCGCACT	21771 cullin 1	AW494296	O	O	PrI	6 B3	NM_012042 // cullin 1	7q36.1	NM_003592 // cullin 1
ATCCTGGCTA	260139 paralog of bacterial VACUOLAR ACID TREHALASE PRECURSOR	BE947107	O	O	M	6 B3	NM_016806	7p15	NM_002137	CYMD
CTCTTTCTTG	24642 ESTs	AI851093	I	scO(vO)	Pr(is)	6 B3	NM_146168	7p14.1	NM_030796
ACCACTGATA	30069 D6Ertd772e DNA segment, Chr 6, ERATO Doi 772, expressed	AI843287	?	O	Pr(is)	6 B3	NM_025816	7p15	NM_006024
ACTGCTTGCC	29815 Mat2a methionine adenosyltransferase II, alpha	AI849149	n	scI(o)	P	6 C1	NM_145569	2p11.2	NM_005911	RP28
TATTTTGTGG	200518 Solute carrier family 6 (neurotransmitter transporter, taurine), member 6	AA930475	?	scO(o)	Pr(is)B	6 D1	NM_009320	3p25-p24	NM_003043
TAGGAGGTAA	7335 cellular nucleic acid binding protein	BE285861	?	?	Pr(is)I	6 D1	NM_013493	3q21	NM_003418
CTCCAGATTG	252137 rabenosyn-5	BE948977	?	?	Pr	6 D1	NM_030081	3p25.1	NM_022340
GAGCCAGTAT	2291 TIA1 cytotoxic granule-associated RNA-binding protein	AA858641	O	O	Pr	6 D2	NM_011585	10q	NM_003252
TACGTTTCTA	5260 gamma-aminobutyric acid (GABA-A) transporter 1	AI840959	sO	scI(o)	A	6 E3	NM_178703	3p25-p24	NM_003042
CGGGGCCTTC	28524 KIAA0592	AI849100	O	O	n	6 E3	NM_026585	10q11.22	---
TGATGCTAAC	219755 Rho GTPase-activating protein	AI849784	O	sO(p)	A	6 E3	NM_080448	ND	ND
TCTGGCTGGA	2965 rhodopsin	BE950188	n	n	Pr(is)	6 E3	NM_145383	3q21-q24	NM_000539 // rhodopsin
none	44683 GABA transporter 4	AW120565	n	vI	sA	6 E3	NM_172890	3p25.3	NM_014229
TGCACTTGAC	24126 large gene family of multispan membrane proteins	AI854179	O	vO	Pr(is)B	6 F1	NM_197985	12p13.31	NM_024551
TGGCTGTTGC	6822 Mph1	AA068450	O(sci)	O(scI)	?	6 F2	NM_007905	12p13	NM_004426
ATTTAAGAAG	193526 Cold shock domain protein A	AI843687	sO	scO	Pr(is)	6 F3	NM_011733	12p13.1	NM_003651
TACCCGCCGT	3141 cyclin D2	AW124502	n	CM	CM(pri)	6 F3	NM_009829	12p13.32	NM_001759 // cyclin D2
TCTCCATTTG	30870 Clra C lectin-related protein A	AI481947	?	?	PrI	6 F3	NM_153506	12p13.31	XM_113729
TTTTGTGCAT	8046 cyclin-dependent kinase inhibitor 1B (P27)	AI852158	sO	vO(o)	M	6 G1	NM_009875	12p13.2	NM_004064
none	20861 LDLR6	AW121357	O	vO	M	6 G1	NM_008514	12p11-p13	NM_002336
TTTTGTGCAT	2958 Cdkn1b cyclin-dependent kinase inhibitor 1B (P27)	AI843786	O	vO	M	6 G1	NM_009875	12p13.2	NM_004064
TAAAAAAAAA	10301 phosphatidylinositol 3-kinase, C2 domain containing, gamma polypeptide	AA967810	P	O	Pr	6 G2	NM_011084	12p12	NM_004570
GGATGGGGAG	204705 Psk1-pending type I transmembrane receptor (seizure-related protein)	AI835902	sO	sO	sB	7	NM_144926	16p12.1	NM_012410	RP22
TGAAAAAATA	27338 ESTs	AI849532	O	O	A(pri)	7	NM_026436	11p15.1	NM_153347	AA
GCCATCCCGG	23434 ESTs	AI843519	I	scO(sci)	Pr(a)	7	XM_133706	16p12.1	NM_031478	RP22
CTTGTGATTT	8008 Cone-rod homeobox containing gene	AI845817	sscO	scO	Pr(is)I	7 A1	NM_007770	19q13.3	NM_000554
GGGGGCCAGA	44232 heptacellular carcinoma novel gene-3 protein (PDZ-binding?)/C-terminal v.similar to Xenopus Frodo	AI836102	O	O	Pr	7 A1	XM_355863	19q13.33	NM_145056
GCAAAGAAAA	29729 tweety homolog 1	AI595436	?	vO	M	7 A1	NM_021324	19q13.4	NM_020659
CCGGCCGGGC	22831 leukocyte receptor cluster (LRC) member 8	AW489006	O	vO	Pr	7 A1	NM_172736	19q13.42	NM_052925
CCCTGAATAA	130902 ESTs	AA616812	O	O	PrB	7 A2	AK037284	ND	ND
ACACAATAAA	56990 Ercc2 excision repair cross-complementing rodent repair deficiency, complementation group 2	AI843631	O	O	PrI	7 A2	NM_007949	19q13.3	NM_000400
ATGGCTCACA	15781 upstream transcription factor 2	BE980761	O	O	I(o)	7 A2-B1	NM_011680	19q13	NM_003367
TAGTGGGGCA	142612 ESTs, Highly similar to ZINC FINGER PROTEIN HRX [Homo sapiens]	BE282854	P	O	n	7 A3	XM_194342	19q13.1	NM_014727
GCCTTGACCA	34537 ESTs, Highly similar to CEBA_MOUSE CCAAT/ENHANCER BINDING PROTEIN ALPHA [M.musculus]	AI843304	O	O	I(pr)	7 A3	NM_007678	19q13.1	NM_004364
GAATCAAAGC	222680 Rgs9bp regulator of G-protein signalling 9 binding protein	BE981862	O	O	PrI	7 A3	NM_145840	19q13.12	XM_292756
GGCTTTCCAC	297044 ESTs/Abeta crystallin-related/small HSP-like	AI852989	O	sscO(o)	Pr	7 A3	XM_145511	19q13.13	NM_144617
TAGCCTAGGC	101833 similar to F-box only protein 27; F-box protein FBG5 (LOC233040)	AW211925	?	O	Pr	7 A3	AK053292	19q13.2	NM_178820
ACTCCTGTCC	29705 ESTs	AI844915	?	I(o)	n	7 A3	XM_133283	19q13.13	NM_015526
CGTCACTGCC	42855 Prostate tumor over expressed gene 1	AI838337	vO(sco)	vO(o)	I(pr)	7 B2	NM_133949	19q13.33	NM_017432
GACTTCCAGG	3960 interferon regulatory factor 3	AI842684	?	?	PrI	7 B2	NM_016849	19q13.3-q13.4	NM_001571
TTTTTGTACA	25045 S13293 KDEL receptor	AI846558	?	?	P	7 B2	NM_133950	19q13.3	NM_006801
GAGGTCCCCA	68170 Kcnj14 potassium inwardly-rectifying channel, subfamily J, member 14	AI717104	?	vO(o)	Pr(is)A	7 B2	NM_145963	19q13	NM_013348
GTCGTCCTCT	41613 VGLUT-1	AI851913	?	?	Pr(is)B	7 B2	NM_182993	19q13	NM_020309
CCCTTCCCTT	2660 ESTs/similarity to Fv1	AI850896	sO+I	vO	M	7 B3	NM_025880	3q25.1	XM_304876
TGCCGGCAGT	31514 ESTs, Moderately similar to cell growth regulator rCGR19 [R.norvegicus]	AI462472	P	P	PrI	7 B3	NM_153057	16p13.11	NM_014287	RP22
GCGTTGGTCT	22121 Pm5	AI836020	P	P	P	7 B3	NM_153057	16p13.13	NM_173614
AAAGCCAAGA	30200 ESTs, Highly similar to ELECTRON TRANSFER FLAVOPROTEIN BETA-SUBUNIT [Paracoccus denitrificans]	AI848359	?	O	PrI	7 B3	NM_026695	19q13.3	NM_001985
TAGGCCGGAG	20428 stem cell growth factor	AI841926	O	vO	PrI	7 B3-B5	NM_009131	19q13.3	NM_002975
TTTAGTGACG	18538 ADP-ribosylation factor-directed GTPase activating protein, isoform a/DEF-1 alters cell motility through the deactivation of ARF1	AW049142	scI(p)	scI(o)	sA	7 B5	BC030682	NULL	NULL
GGTGTTGCTT	274702 ESTs	BE689206	P	P	P	7 C	BC022600	15q25.2	NM_022480
GACTGACCCT	8004 gamma-aminobutyric acid (GABA-A) receptor, subunit beta 3	AI849425	O	O	I(o)	7 C	NM_008071	15q12	NM_000814
TAAAACCGTT	250681 Mef2A	BE953554	O	O	I	7 C	NM_013597	15q26	NM_005587
TATGCAACCC	250919 necdin	BE951820	I(sO)	I	sAG	7 C	NM_010882	15q11.2-q12	NM_002487 // necdin
CTGGGAGCAT	21287 unc-45-like	BC004717	?	?	P	7 D1	NM_133952	15q26.1	NM_017979
TCTTGGTGAC	138007 ESTs	AI480988	?	scO(o)	Pr	7 D2	NM_172903	15q25	NM_006122
CCTAATGAGA	68712 frizzled homolog 4 (Drosophila)	BE865233	R	R+CM	Pr	7 D3	NM_008055	11q14.2	NM_012193 // frizzled 4
GGCCTCTGGC	250763 ESTs/PP1665	AI112541	O	O	Pr	7 E1	BC024955	11q13.4	NM_030792	VRNI
GGAGGGATCA	8131 ILK	AI854596	O	vO	M(pr)	7 E1	NM_010562	11p15.4	NM_004517	AA
GAATTGATGA	41583 ESTs, Moderately similar to PTD015 [H.sapiens]	AI838594	O	O	PrI	7 E1	NM_183251	11q13.4	NM_024684	VRNI
GCCCCAATAA	28896 Stard10 START domain containing 10	AI849800	?	O	Pr(is)A	7 E1	NM_019990	11q13	NM_006645	VRNI
AAAGCAAAAA	207113 ESTs	AI854413	?	P	I(pr)	7 E1	NM_175388	11q13.3	XM_171476	VRNI
CAAAAAAAAA	55143 Dickkopf homolog 3	AI838192	O	vO	M	7 E3	NM_015814	11p15.2	NM_013253	AA
CTAATAAACG	29122 0610012D09Rik RIKEN cDNA 0610012D09 gene	AA152995	sO	vO	n	7 F1	NM_021554	16p13-p12	NM_016025
GCAACCAAAA	3990 suppressor of K+ transport defect 3	AI840786	O	vO	MPr	7 F1	NM_009191	11q13.2	NM_030813	VRNI
GTTCTGATTG	1640 cerebellar degeneration-related 2	AA673164	?	O	Pr	7 F1	NM_007672	16p12.3	XM_071866	RP22
TCTGGGTGTG	16525 polo-like kinase homolog, (Drosophila)	BG144569	vO	vO	PrB	7 F2	NM_011121	16p12.2	NM_005030 // polo-like kinase	RP22
TTTGTGGTTG	9114 Mus musculus mu-crystallin (Crym) mRNA, complete cds	AI596647	sO	vO	M	7 F2	NM_016669	16p13.11-p12.3	NM_001888 // crystallin, mu	RP22
TTCTACGAGT	29924 ARL-interacting protein 6	AI840673	sscO	sscO-vO	A	7 F3	BC010196	16p12.3	NM_015161	RP22
AAGTTTTCAG	41998 Ppp4c protein phosphatase 4, catalytic subunitt	AI842434	sO	vO	Pr(is)	7 F3	NM_019674	16p11.2	NM_002720
TGCACAGTCC	23031 novel OZF-type Zn finger	BQ573212	sO	O	I	7 F3	NM_146202	16p11.2	NM_024671
TATGCAGATT	16340 FGFR2	AI837769	O	vO	n	7 F3	NM_010207	10q26.13	NM_000141
AACTTGGCAA	20301 ESTs, Weakly similar to ZINC FINGER PROTEIN ZFP-27 [Mus musculus]	BE456487	O	O	PrI	7 F3	NM_026999	16p11.2	NM_145271
CTGGGTCTGC	225649 ESTs/KIAA0140 homolog (putative nuclear protein)	AI467602	O	scO(o)	PrI	7 F3	NM_175268	10q26.2	NM_014661
TTGAATAGTT	156718 ESTs/crooked legs homolog	AI605454	I(o)	I(sco)	sG	7 F3	NM_177226	16p11.2	XM_034819
CACTCTCAGA	287423 ESTs	AI552778	?	vO(o)	PrI	7 F3	AK122309	16p12.2-p12.1	XM_044632	RP22
GGCAGCCCAG	11112 spinster-like protein	AI851064	?	P	PrI	7 F3	NM_023712	16p12.1	AF212371
TTCCCCACCC	29759 MYC-associated zinc finger protein (purine-binding transcription factor)	AA013502	sO(o)	vO(p)	M	7 F4	BC004758	16p11.2	NM_002383
CTGCTGTACC	250414 Dpysl4 dihydropyrimidinase-like 4	BE992883	I+sO	O	n	7 F4	NM_011993	10q26.3	NM_006426
ATCCTGGCTA	260139 paralog of bacterial VACUOLAR ACID TREHALASE PRECURSOR	BE947107	I+sO	O	?	7 F4	NM_145387	11p15.5	NM_025092	AA
TTTCAAATAA	86322 Transforming, acidic coiled-coil containing protein 2	BE951434	I(sO)	O	Pr(is)I	7 F4	NM_021314	10q26	NM_006997
GGATTTGGCT	14245 Ribosomal protein, large P2	AI853822	sO	vO	I(p)	7 F5	NM_026020	11p15.5-p15.4	NM_001004	AA
GTCCAGGAAA	22288 cyclin D1	AW489617	O	vO+svI	n	7 F5	NM_007631	11q13	NM_001758	VRNI
ACTTGTTTTC	3904 fibroblast growth factor 15	AA051675	O	vO	n	7 F5	NM_008003	11q13.1	NM_005117	VRNI
TAAATAAAAC	28392 Mus musculus deformed epidermal autoregulatory factor 1 mRNA, complete cds 20826 G1 to phase transition 2	AI847030	O	scO(o)	PrI	7 F5	NM_016874	11p15.5	NM_021008	AA
CGGATTCGCA	274868 ESTs	AI839397	n	I(o)	P	7 F5	AK014760	11p15.5	NM_003957	AA
CATTTTCTGG	3862 insulin-like growth factor 2	AI841331	ast	ast	n	7 F5	NM_010514	11p15.5	NM_000612	AA
AGACGGATGT	39987 dual specificity phosphatase 8	AA500835	?	Vo	M	7 F5	XM_181424	ND	ND
GTACTTGGCT	210287 Sv2b synaptic vesicle glycoprotein 2 b	AW045524	sO	sscO	PrsB	7C	NM_153579	15q26.1	NM_014848
GCAAGCGCTC	24268 weakly similar to topoIII	AI661037	O	vO(o)	Pr	8	NM_146208	4q34.3	NM_018248	RP29
GGGGAGACGC	254496 FGFR1	BE947453	O	vO	M	8 10.0 cM	NM_010206	8p11.2-p11.1	NM_000604	CORD9
ATGGTGGATT	2137 transcriptional regulator, SIN3B (yeast)	AI325193	P	P	P	8 33.0 cM	NM_009188	19p13.11	---
GGATGATGAA	2376 nuclear receptor subfamily 2, group F, member 6	AI853940	I	vO(I)	A	8 33.5 cM	NM_010150	19p13.1	NM_005234
GGTGAGCCTG	42948 peroxiredoxin 2	BE310272	P	P	I(pr)	8 36.0 cM	NM_011563	13p13.2	NM_005809
GCAAAGCAGC	13799 G protein-coupled receptor 56	AI841654	I-O	vO	n	8 45.0 cM	NM_018882	16q13	NM_005682
CAATCATAGG	34641 autocrine motility factor receptor	AI843627	I	I(o)	I(pr)	8 45.0 cM	NM_011787	16q12.2	NM_001144
TAGACGTACT	18916 Glutamate oxaloacetate transaminase 2, mitochondrial	AI835003	sO	vO+scI	Pr(is)IsGC	8 46.0 cM	NM_010325	16q21	NM_002080
TACGAAAATG	1571 cadherin 11	AI840537	O	vO	M	8 46.5 cM	NM_009866	16q21	NM_001797
CCGCCCCTTT	29846 Ndr4 N-myc downstream regulated 4	BF449994	n	I+svO	sAG	8 50.0 cM	NM_145602	16q21	NM_020465
TCCTCGGTGT	488 ESTs	AW121081	O	O	PrI	8 53.5 cM	NM_009149	16q22.3	NM_012201
GGCACCTGGT	24117 ESTs, Moderately similar to unnamed protein product [H.sapiens]	BE309729	P	O	PrI	8 7.0 cM	NM_026792	8p23.1	NM_018361
TGAAGCAGAA	34210 ESTs, Highly similar to CTXN_RAT CORTEXIN [R.norvegicus]	AI840965	P	P	P	8 A1.1	NM_183315	19p13.3	XM_294924
GAAACCCCGC	18517 RAS p21 protein activator 3	AI848749	O	O	PrI	8 A1.1	NM_009025	13q34	NM_007368
CGTACAGTAT	268163 AW121567 expressed sequence AW121567	AI835545	O	O	Pr	8 A1.1	NM_173446	13q33.3	L10374
GGAGGCCACC	257337 guanine nucleotide exchange factor Dbs	AI853669	I	O(I)	n	8 A1.1	XM_134017	13q34	NM_024979
ACGACCATCA	34901 GH regulated TBC protein 1	AI848309	?	?	P	8 A1.1	NM_025768	13q34	NM_024719
GTCACTCCCC	23739 XAB2/HCNP	AI851650	?	O	PrB	8 A1.1	NM_026156	19p13.3	NM_020196
GCGGCGTCCG	103427 ESTs	AW049189	?	?	B(pr)	8 A1.1	NM_178708	13q34	NM_018386
GGCATTTTAA	925 transcription factor Dp 1	AI848677	I	scI(p)	I(pr)	8 A1-A3	NM_009361	13q34	NM_007111
TCTTTTTTTT	110444 nicotinic acetylcholine receptor beta 3	BE988678	I	vI(o)	sAG	8 A2	AF467896	8p11.2	NM_000749	CORD9
TTAAACTACC	125242 novel Zn finger	BE106620	?	O	PrB	8 A2	NM_177086	8p11.21	NM_024645	CORD9
AGAATAAAGA	20288 glutathione reductase 1	AI854660	sO	vO	PrI	8 A3	NM_010344	8p21.1	NM_000637	ROA1
GCCCCAGCCC	12436 RNA binding protein gene with multiple splicing	BF460865	O	O	PrI	8 A3	NM_019733	8p12	NM_006867
CGTCTGGAGT	23916 novel dual specificity phosphatase	AI849060	I(o)	I(o)	sA	8 A3	AK009781	20p12	NM_012261
TCCCTATTAG	34326 Zdhhc2 zinc finger, DHHC domain containing 2	AI845904	O	scO	Pr	8 A4	AK017566	8p21.3-p22	NM_016353	ROA1
GAGAACGAGG	200266 ESTs, Highly similar to angiotensin II AT2 receptor-interacting protein [M.musculus]	AI840524	O	O	PrB	8 A4	NM_178902	8p22	NM_020749	ROA1
TCTGCAAAGG	1693 high mobility group box 2	AW046897	sscO	svO	Pr(is)B	8 B2	NM_008252	4q31	NM_002129
ATCCTGGTAA	31395 carboxypeptidase E	BE686085	?	P	Pr(is)I	8 B3.1	NM_013494	4q32.3	NM_001873	RP29
CAAACAGTGA	37607 BC003498 cDNA sequence BC00398	AI846073	?	O	Pr	8 B3.1	NM_030263	8p22	NM_018422	ROA1
TTCTGAGTAT	23002 brain-specific membrane-anchored protein	BE987521	sO(o)	vO	M	8 B3.3	NM_182991	19p12	NM_012109
TCCCTACTAA	40648 BC026744 cDNA sequence BC026744	AI853065	sO	sO	PrI	8 B3.3	NM_028993	19p13.11	XM_048457
CACTACCGCC	213208 similar to hypothetical protein BC014127	AW495183	n	n	Pr	8 B3.3	NM_145598	19p13.12	NM_138454
ATTATATTTT	10727 vacuolar adenosine triphosphatase subunit B gene	AI836241	I(vo)	O	sAG	8 B3.3	NM_007509	8p22-p21	NM_001693
AGCGTGTGAT	6667 single-strand DNA binding protein 3	AI854882	?	scO	PrB	8 B3.3	NM_133772	19p13.1	NM_032627
CAAATGGATC	15185 Smad1	AI851041	P	vO(o)	n	8 C1	NM_008539	4q28	NM_005900
TGACCAGCGA	20872 like-glycosyltransferase	AI838557	?	O	Pr(is)BsG	8 C1	NM_010687	22q12.3	NM_004737
TATGCTATTG	29680 ASF1 anti-silencing function 1 homolog B	BF461942	vO	vO	n	8 C2	NM_024184	19p13.12	NM_018154
TGCCCAGTGC	200506 Gtl2 GTL2, imprinted maternally expressed untranslated mRNA	AI847231	scI(sO)	vI(p)	sAG	8 C2	XM_134383	19p13.2	NM_014921
GTAGCAAAAG	206228 Retbindin	BG297968	O	O	Pr(is)	8 C2	NM_144929	19p12	NM_031429
CTGCCTGAGA	154614 syntrophin-associated S/T kinase	AI839858	I	I	AG	8 C2	NM_019945	19p13.2	XM_032034
GGCCTCCCTT	7892 Rfx1 vregulatory factor X, 1 (influences HLA class II expression)	AW050047	?	O	Pr	8 C2	NM_009055	19p13.1	NM_002918
TCATCTCCTG	5400 bromodomain-containing 7	BE985595	O	sO(o)	ast+PrI	8 C3	NM_012047	16q12	NM_013263
GAAACACAGA	284344 Naked cuticle 1 homolog	AI429692	O	vO	M	8 C3	NM_027280	16q12	NM_033119
TCCCTATAAA	5400 bromodomain containing protein 7	BE852686	O	O	Pr	8 C4	NM_012047	16q12.1	NM_013263
TTGGGATGTT	30209 guanine nucleotide binding protein, alpha o	AI323417	sO	sscI	n	8 C5	NM_010308	16q13	NM_020988
CACAGTTGTG	2080 gene trap locus 3	BF461633	O	O	I	8 C5	NM_008187	16q13	NM_013242
CTAACTGATA	28005 Bbs2 Bardet-Biedl syndrome 2	AI851478	?	O	PrB	8 C5	NM_026116	16q21	NM_031885
none	153872 LOC214572 Similar to Protein arginine N-methyltransferase	AI840653	sO(o)	vO	PrI	8 D3	NM_145404	16q22.1	NM_019023
TCTTAGGACC	28323 ESTs	AI852614	P	vO(o)	PrI	8 D3	NM_177150	16q22.1	NM_025082
ATACAATAAA	196148 NUCLEAR TRANSPORT FACTOR 2	BE987802	O	O	M(pr)	8 D3	NM_026532	16q22.1	NM_005796
AAGCTGTGAG	180410 ESTs/Zn finger	AI844003	I	I(vo)	n	8 D3	BC023180	16q22.2	NM_017530
GGCCCCAAAC	3758 Bcar1 breast cancer anti-estrogen resistance 1	BF451396	?	vO(o)	PrI	8 D3	NM_009954	16q22-q23	NM_014567
TGAGCTCTGC	133990 ESTs/nuclear protein weakly similar to neuritin	AW049861	?	vO(o)	PrB	8 D3	NM_175024	16q22.1	XM_058747
TTGCAGCAAA	23494 ESTs/KIAA0931	BE303825	?	O	Pr	8 D3	XM_146511	16q22.2	XM_041191
GGCCAAAGAA	29620 spastic paraplegia 7	BF461063	n	?	Pr	8 E1	NM_153176	16q24.3	NM_003119
GCTTTTTACC	36756 2700067E09Rik RIKEN cDNA 2700067E09 gene	AW124838	n	O	Pr(is)	8 E1	NM_175185	16q24.1	NM_031463
GACCTCGGCC	273059 1190005I06Rik RIKEN cDNA 1190005I06 gene	AI844196	I	I	Pr	8 E1	AK004494	ND	ND
AATAAAGCCA	34855 4632419I10Rik: RIKEN cDNA 4632419I10 gene	AI847127	?	O	PrI	8 E1	NM_054046	16q24.3	NM_017702
CAGGATAGGT	247404 Zinc ring finger protein 1	AI853840	?	?	I(pr)	8 E1	NM_133206	16q22.3	NM_032268
GACCTCGGCC	273059 ESTs	AA879501	?	O	PrIn	8 E1	NM_197988	ND	ND
GGCTGAGTTC	24141 ESTs	BE986740	sO	svO(o)	PrI	8 E2	NM_025615	1q42.2	BC053609
GCAGATGGCA	10800 potassium channel, subfamily K, member 1	AI842576	I	P-I(vO)	M	8 E2	NM_008430	1q42-q43	NM_002245
TTGACCGTAA	41423 ESTs	AI837158	I	O	sG	9 A1	NM_028013	11q21	XM_290546
ATAACCCAAA	196137 HLA class II region expressed gene KE2	AW049111	O	vO(o)	PrI	9 A3	NM_027911	19p13.2	NM_014260
GGTGGAGCAG	101670 ESTs, Weakly similar to unnamed protein product [H.sapiens]	BE946927	O	O	PrI	9 A3	NM_144935	19p13.13	NM_022737
TTTGTACAAA	212826 robo-3	AW494771	n	sscI(vO)	Pr	9 A4	NM_011248	11q24.2	AK024697
TTCACTGGGC	20935 interleukin enhancer binding factor 3	BE371872	?	vO(o)	I(pr)	9 A4-A5	NM_010561	19p13.2	NM_004516
CTGGTTCCTT	261326 ESTs	AA396355	O	O	Pr	9 A5.1	AK128910	11q23.3	NM_174926
AAAAGAAATA	133615 similar to ubiquitin-associated and SH3-containing protein	BF122686	O	scI(o)	PrIsAG	9 A5.1	NM_176860	11q24.1	NM_032873
GAAGTCCAGT	138434 ESTs	AW046765	?	O	P	9 A5.1	NM_172768	11q24.1	AB033027
TCTGGACGCG	261668 H2A histone family, member X	AI844648	sO	sO	n	9 A5.2	NM_010436	11q23.2-q23.3	NM_002105
CAGCAACCTT	2389 myeloid/lymphoid or mixed-lineage leukemia/All	AA118875	O	vO	AG	9 A5.2	BC044818	11q23.3	NM_005933
AGCCCAAGGG	12914 Ubiquitin specific protease 2	AI846522	n	n	PrB	9 A5.2	AK047204	ND	ND
TATAATACCA	3951 thymus cell antigen 1, theta	AI843835	I	vI	G	9 A5.2	NM_009382	11q22.3-q23	NM_006288
TGGTACAACC	260103 ESTs	AI450905	?	O	Pr	9 A5.2	NM_172531	11q23.3	NM_014956
TATTCTGTTT	194217 ESTs/novel Dsh family member	AI846211	scI(o)	O	PrA	9 A5.3	XM_284495	11q23.1	XM_290496
CTGGGGTAGG	30232 ceroid-lipofuscinosis, neuronal 6	BF466462	vO	vO	M	9 B	XM_134858	15q23	NM_017882
CCTGGCACTG	102278 secretory carrier membrane protein 5	AI838908	P	P	PrI	9 B	NM_020270	15q23	NM_004203
ATTGTACCAG	34797 cellular retinoic acid binding protein I	BE980033	O	vO(o)	M	9 B	NM_013496	15q25.1	NM_004378
ACATTCCTCA	28437 REC14	AI836794	O	vO	PrI	9 B	NM_023191	15q25.1	NM_025234
ATTTCAAAGC	23745 ESTs	AW050057	O	O	n	9 B	NM_145616	15q22.32	NM_017691
GAGACATTTC	103641 PNR	AW533690	n	scO	Pr	9 B	NM_013708	15q22.32	NM_014249
TCCTTTTCTA	186499 ESTs, Weakly similar to immunoglobulin superfamily containing leucine-rich repeat	AI835355	I	I	sAG	9 B	NM_177193	15q22.33	XM_027396
CAGCTCTTGG	268104 AA517853 expressed sequence AA517853	AW046086	?	vO(o)	I	9 B	NM_153799	15q23	NM_025083
GCATTAGCCT	150221 EST/contains GRAM domain (membrane associated proteins)	BE945581	?	O	Pr	9 B	XM_134926	15q22.33	XM_113796
ATGCATCCTT	248549 immunosuperfamily protein Bl2	AI845618	O	vO	PrI	9 B-C	NM_018770	11q23.3	NM_014333
AGCGTCTGCA	156243 rod exchanger/solute carrier family 24 (sodium/potassium/calcium exchanger), member 1 (SLC24A1)	BG295169	sO	?	Pr	9 C	NM_144813	15q22	NM_004727
GCAATTGACA	24069 ESTs/Fem1-like death domain receptor binding protein	AI852273	O	scI+svO	M	9 C	NM_010193	15q23	NM_015322
CTGAAATTGT	27462 Thyroid hormone receptor interactor 4	BG147071	O	O	PrI	9 C	NM_019797	15q22.1	NM_016213
GTGTGGCCAG	38869 Mus musculus protein inhibitor of activated STAT protein PIAS1 mRNA, complete cds	AA881370	?	O	I(pr)	9 C	NM_019663	15q	NM_016166
AAAACATCTC	16553 NEDD4 ubiquitin ligase	AI849629	scI(o)	scI(o)	sA	9 D	NM_010890	15q21.3	---
AAGGTAGGTT	196630 ESTs	AI851309	P	vO(o)	PrI	9 D	NM_181072	15q22.2	NM_004998
TAGTTCCTAT	36894 Tcf12 transcription factor 12	AI850155	?	O(I)	MPr	9 D	NM_011544	15q21	NM_003205
AAATCTGCCC	101559 ESTs	BE572671	?	?	Pr(is)	9 E1	NM_173386	6q14.1	NM_138441	RP25/LCA5/MCDR1
CAGTCACCAA	83949 Elongation of very long chain fatty acids (FEN1/Elo2, SUR4/Elo3, yeast)-like 4	AI463874	?	O(vO)	PrI	9 E2	NM_148941	6q14	NM_022726	RP25/LCA5
GCCTCCCAAA	18729 Copb2 Coatomer protein complex, subunit beta 2	AI551191	?	O	P	9 E3-F1	NM_015827	3q23	NM_004766
GTAGACAGCA	133164 leucine zipper transcription factor	AI666705	O	O	Pr	9 F	NM_033322	3p21.3	NM_020347
CCTGCTACCT	268925 ab hydrolaze	AW323348	O	O	Pr	9 F1	NM_145919	3p21.1	NM_015407
none	416 TRAF-interacting protein	BC006929	?	sscI(o)	sA	9 F1	NM_011634	3p21.31	NM_005879
ACTTACATTC	30058 Solute carrier family 38, member 3	AI839742	sO	vO	MPr	9 F2	NM_023805	3p21.3	NM_006841
TTGTCCCTCC	69061 guanine nucleotide binding protein, alpha transducing 1	BE950676	n	n	Pr(is)	9 F2	NM_008140	3p21	NM_000172
GTGTTTGAAA	3176 Prkar2a protein kinase, cAMP dependent regulatory, type II alpha	AI836829	I	vO	PrI	9 F2	NM_008924	3p21.3-p21.2	NM_004157
CTGAGCTGCA	29493 WD repeat domain 6	AI840166	I	vO(i)	n	9 F2	NM_031392	3p21.3	NM_018031
12903 Sema3F	12903 Sema3F	BF465341	?	?	M	9 F2	NM_011349	3p21.3	NM_004186
TCTTTTGTGT	41744 ESTs	AI849443	?	scO(o)	Pr	9 F2	NM_177771	3p21.31	NM_025010
TAATAGCTAG	2395 male enhanced antigen 1	AI605752	?	scO	Pr(is)	9 F2	NM_183250	3p21.31	NM_015933
CAGGCTTGTG	276336 inositol hexakisphosphate kinase 2	BF163467	?	vO+scI(o)	Pr(is)B	9 F2	XM_135089	3p21.31	NM_016291
CAGAGATCCC	196464 guanine nucleotide binding protein, alpha inhibiting 2	AA049190	sO	vO	M	9 F2	NM_008138	3p21	NM_002070
GAACCAGTTA	29362 Di-ras2	AI425960	O	vO+Bv	AG	9 F3	NM_013727	3p23	NM_022461
AAGGCAAAGA	43749 ribosomal protein L14	AI839125	vO	vO	n	9 F4	NM_025974	3p22-p21.2	NM_003973
TTTTTGAACA	3476 Catenin beta	AI848684	sO	vO	n	9 F4	NM_007614	3p21	NM_001904
TCCAGTTTTT	34670 kinesin-like 7	AI450873	P	P(vO)	I	9 F4	NM_010620	3p21.32	NM_020242
AGCCTGAACA	257989 SNF related kinase	BE952136	O	scO	Pr(is)	9 F4	NM_133741	3p21.32	NM_017719 // SNF-1 related kinase
CCTGATCTTT	4071 Lamr1 laminin receptor 1 (ribosomal protein SA)	W58024	?	vO(o)	Pr(is)I	9 F4	NM_011029	3p21.3	NM_002295
TTTCTACGTA	35790 ESTs, Highly similar to CGI-140 protein	AI851626	O	vO	?	multiple sites	BC024937	19p13.2	NM_016145
ATGCTAGAGG	34779 ubiquitously expressed transcript	AW047205	O	O	PrB	multiple sites	NM_013840	Xp11.23-p11.22	NM_004182	PRD/OPA2/COD4/AIED/RP with mental retardation
AGGAGCAAGC	150554 EST	BE949356	O	O	PrI	ND	ND	ND	ND
CAAGCAAAAC	152323 ESTs/internal to DRIM	BE947591	O	vO(o)	Pr	ND	ND	12q23.3	ND
AAATGTAAAT	32434 ESTs/no predicted gene	AA189760	O	vO	B	ND	ND	ND	ND
TCCCCCTCAA	35829 Mus musculus mRNA for erythroid differentiation regulator, partial	BE630719	O	svO	n	ND	NM_133362	ND	ND
GGAGCCCCTC	33390 ESTs, Moderately similar to serine/threonine protein kinase TAO1 [R.norvegicus]	AI844498	I(o)	I(o)	Pr(is)A	ND	ND	ND	ND
GTTGAAGTAA	24219 ESTs	AW047207	I	vO	Pr(is)I	ND	NM_024461	4q27	XM_291257
ATAACAAAAT	154145 ESTs/Zn finger	AI849779	?	vO(o)	I(pr)	ND	ND	ND	ND
none/GTACTGGCCA	218638 Mus musculus MTV-3 regulated mRNA sequence	AI840174	?	P	A	ND	ND	ND	ND
GCACGAACAT	275844 ESTs/novel metalloprotease	AI836224	?	?	Pr(is)B	ND	NM_024190	7q22	XM_168256
CCCAACGGGG	275761 Tsix	BE625129	sO	sO	I	X	AF138745	Xq13.2		COD4/RP with mental retardation
AGCAGTTTCT	38058 similar to NIM family protein kinase	AI840103	scI(o)	I(o)	Pr(is)	X	ND	5p13.1	NM_153361	MCDR3
GTACATTGTA	260515 ESTs/nucleolin paralog	AA967800	scI	scI	A	X	NM_025355	Xq22.2	NM_032926	RP23
CAAGTTTCCA	3126 four and a half LIM domains 1/KyoT2	AI849859	O	vO	M	X	NM_010211	Xq26	NM_001449	RP24
GCGGGGTCGC	4881 Pcsk1n proprotein convertase subtilisin/kexin type 1 inhibitor	AI848336	scI(o)	scI(o)	Pr	X A1.1	NM_013892	Xp11.23	NM_013271	PRD/OPA2/COD4/AIED/RP with mental retardation
TGCAAATGGA	25148 Atp6ap2 ATPase, H+ transporting, lysosomal accessory protein 2	AI848681	I(vo)	vO	sA	X A1.1	NM_027439	Xq21	NM_005765	RP with mental retardation
TAGATTTGGG	21868 raf-related oncogene	AI893976	P	O	M	X A2-A3.1	NM_009703	Xp11.4-p11.2	NM_001654	OPA2/COD4/AIED/RP with mental retardation
none	658 Adenine nucleotide translocator 2, fibro	AI843783	I(o)	vO	Pr(is)	X A4	NM_007451	Xq24-q26	NM_001152	RP24
TAAAGTAATA	255890 zinc finger protein of the cerebellum 3	AI853858	?	P	P	X A5	NM_009575	Xq26.2	NM_003413	RP24
AGAAGTGTTT	340 High mobility group box 3	AI853499	O	vO(o)	PrI	X A7.1	NM_008253	Xq28	NM_005342
GAGCCCTTCC	12775 pyruvate dehydrogenase kinase 3	AI845462	sO	svO	M	X C1	NM_145630	Xp22.12	NM_005391	RP23
TCACAATGAG	4095 inactive X specific transcripts	BE984736	ssI	n	I	X D	AK011511	Xq13.2	XM_072568	COD4/RP with mental retardation
TGACTGTGAG	41489 9030603L14Rik RIKEN cDNA 9030603L14 gene	BE947384	?	?	PrB	X E3	NM_026239	Xq22.1	NM_021637	RP23
ACTGTGTCTT	40035 p21 (CDKN1A)-activated kinase 3	AI844318	I	vO	M	X F2	NM_008778	Xq22.3-q23	NM_002578	RP23
TATGTGGTTT	2734 spermidine/spermine N1-acetyl transferase	AI838953	O	O-vO-O	M	X F3-F4	NM_009121	Xp22.1	NM_002970	RP23
