# Supplementary material for: Genomic Analysis of Mouse Retinal Development
Source: PLoS Biol. 2004 Jun 29;2(9):e247. doi: 10.1371/journal.pbio.0020247 (PMC439783; doi:10.1371/journal.pbio.0020247)
Supplement: Table S14 — The values shown here are the average sum-of-squares within k-means clusters over all variables. Euclidian mean distance–directed clustering is used (Hartigan 1975). The proportional reduction of error (PRE) for each number of clusters is also shown. This measures the ratio of reduction in within-cluster dispersion to the previous within-cluster dispersion (Hartigan 1975). For this analysis, PRE is given by (Ni − N(i – 5))/Ni, where N is the average within-cluster distance and i is cluster number. (14 KB XLS). [file pbio.0020247.st014.xls]

## Sheet: Sheet1
Table ST14
Mean within-cluster distance for cellular expression data
Number of clusters	Mean within-cluster distance	PRE
10	10453	NA
15	9078.96	0.131448
20	8207.82	0.0959515
25	7669.42	0.065596
30	7260.87	0.05327
35	6869.49	0.0539026
40	6549.14	0.0466337
45	6298.91	0.0382081
50	6079.42	0.0348457
55	5817.38	0.0431028
60	5533.2	0.0488502
65	5388.61	0.0261314
